# Supplementary material for: Repurposing a chemosensory macromolecular machine
Source: PubMed Central journal article supplement (PMC7184735; doi:10.1038/s41467-020-15736-5), 2020-04-27
Supplement: 41467_2020_15736_MOESM1_ESM.pdf [file 41467_2020_15736_MOESM1_ESM.pdf]

## Supplementary Information

### **Repurposing a chemosensory macromolecular machine**

Ortega D. R. *et. al.*

## Supplementary Discussion

Our results also shed light on the biological function of CheD. CheD is thought to interact with chemoreceptors in an adaptation mechanism together with CheC and CheY<sup>1</sup>, but more recent results showed that CheD from *Bacillus subtilis* is able to deamidate chemoreceptors *in vitro* without CheC<sup>2</sup>. Our results provide two further pieces of evidence supporting the idea that CheD is able to perform a biological role independently of CheC. First, the ancestral F7 system included *cheD* but not *cheC*. Second, *cheD* co-evolved with the ancestral F7 *cheY* (it was lost in the same evolutionary step), pointing to a functional link.

A recent study in *Comamonas testosteroni*, an organism with a stage 4 F7 system, shows that the kinase CheA is able to phosphorylate both the ancient CheY as well as the recently acquired CheY-F6-like<sup>3</sup>. Deletion of the CheY-F6-like protein completely abolished chemotaxis response, while the deletion of CheY-F7 only partially affected it. The study further shows that CheY-F7 has a much faster auto-dephosphorylation rate than CheY-F6-like. The authors interpreted these results such that the CheY-F6-like is the primary response regulator, and CheY-F7 may act as a phosphate sink. These conclusions are based on previous work in organisms with multiple CheY genes per chemosensory cluster.

However, because CheY-F7 in stages 1 and 2 is the sole response regulator of the system, we hypothesize that it plays a major role in the control of a yet-unknown cellular process, at least in stages 1 and 2. The rapid auto-dephosphorylation does not necessarily imply a phosphate sink as the main biological function of this CheY. Thus, in the intermediate stages of the extant  $\beta$ -Proteobacteria, including the system in *C. testosteroni*, the CheY-F7 may retain both the older unknown function as well as its new role in the control of the flagellar motor.

On the other hand, the immediate loss of McpA and adjacent genes from stage 1 to 3, might indicate the loss of the original F7 function. If this were true, why would the system keep a conserved response regulator (*cheY*) for a lost function? One hypothesis is that the original CheY and CheD might be serving in an auxiliary feedback loop in addition to the canonical CheB/CheR adaptation mechanism in stages 3 and 4. This could compensate response time of the flagellar control as the system acquired mutations to accommodate the new components and function,

providing flexibility. In the stage 5, the system evolved to perform optimum response without the need of CheY/CheD adaptation mechanism, resulting in loss of these components in that stage.

Imaging four  $\gamma$ -Proteobacteria with both F6 and F7 systems by cryo-ET, we observed that the arrays formed by different chemosensory systems were both separate and structurally distinct. This is consistent with previous studies showing physical separation of the arrays from different chemosensory gene clusters in *V. cholerae* (F6 and F9 systems<sup>4</sup>) and *P. aeruginosa* (F6 and F7 systems<sup>5</sup>). It is also consistent with experiments in *E. coli* showing that engineered chemoreceptors with additional heptads cannot form arrays with shorter, native chemoreceptors, likely because of a large physical mismatch in the CheA/CheW layers<sup>6</sup>.

In all cases, we observed that the F7 arrays in non-enteric  $\gamma$ -Proteobacteria were membrane-associated, but it remains unclear how this is achieved. In other arrays, N-terminal hydrophobic alpha-helices of chemoreceptors mediate membrane insertion. Aer2-like receptors in *V. cholerae*, *P. aeruginosa* and *S. oneidensis*, however, lack any predicted transmembrane regions. The *M. alcaliphilum* Aer2-like receptor has two small fragments of transmembrane regions (10 and 14 residues), but these are likely too short to attach the receptor to the membrane. One possibility is that the receptors are post-translationally modified for membrane attachment. Another possibility is that another protein serves as a membrane anchor. Our work ruled out one such candidate – the McpA receptor in the same gene cluster;  $\Delta mcpA$  F7 arrays were still attached to the membrane.

One of the most striking features of the F7 arrays in non-enteric  $\gamma$ -Proteobacteria was the presence of additional density layers between the CheA/CheW baseplate and the IM. Based on our homology models of the receptors, we propose that these layers correspond to domain features (Fig. 2B). The L2 layer matched the PAS domain present in Aer2-like receptors in all four species. The fainter (possibly less-ordered) L3 layer in *V. cholerae* and *S. oneidensis* matched the additional PAS domain in the Aer2-like receptors from these species. This suggests that PAS domains might mediate intra- and inter-trimer interactions, potentially contributing to cooperativity in the signaling array. The L1 layer matched the junction between the HAMP and signaling domains, which is puzzling because this chemoreceptor region is predicted to have low molecular density<sup>7</sup>. It is unlikely that this density is produced by another known chemotaxis protein. For example

CheR, that binds the chemoreceptor in that area, is not expected to have enough abundance to generate a visible density layer<sup>8,9</sup>. Furthermore, previous cryo-ET of *in vitro* preparations containing only *E. coli* CheA, CheW and Tsr showed a similar layer in that region, suggesting one or more of these proteins alone is responsible for the L1 layer<sup>10</sup>. Similarly, the L3 layer in *P. aeruginosa* F7 array appears to be located between 2 HAMP domains. Interestingly, both *P. aeruginosa* L3 and the L1 layer in all organisms coincide with a coupling double alpha-helix linker between two four-helical bundles. However, the composition of these layers remains unclear.

Another mystery is the function of the F7 chemosensory array in non-enteric  $\gamma$ -Proteobacteria. Flagellar motility in these organisms is controlled by the F6 chemosensory system<sup>11-13</sup>, which is expressed under a variety of conditions. In contrast, the *P. aeruginosa* and *V. cholerae* F7 system is only expressed when cells are grown in stressful conditions such as into late stationary phase, induced by the stress-related sigma factor RpoS<sup>5,14,15</sup>. Expression of the F7 system in different conditions has not been studied in *S. oneidensis* or *M. alcaliphilum*, but both organisms live in unique and challenging environments which may be poorly mimicked by laboratory growth; *S. oneidensis* is a facultative anaerobe adapted to changing environments<sup>16</sup> and *M. alcaliphilum* is a haloalkaliphilic methanotroph<sup>17</sup>. While we did not test different growth conditions for *M. alcaliphilum*, we did observe that formation of F7 arrays in *S. oneidensis* was dependent on culture conditions. Another clue is that both *P. aeruginosa* and *V. cholerae* are capable of sensing oxygen, which binds to the PAS-heme domains of Aer2 receptors to activate signaling<sup>18,19</sup>. We therefore favor the working model that the older F7 systems are part of an emergency response system activated by stress conditions, perhaps related to the availability of oxygen. The McpA receptor may also be an important mediator of this response. McpA has no sensory domain, but has been implicated in taxis toward trichloroethylene<sup>20</sup>. A previous study in *P. aeruginosa* showed that McpA physically co-localizes with F6 system proteins<sup>5</sup>. Here we find that despite being part of the F6 system, McpA co-evolved with the F7 system, suggesting that McpA may bridge the two systems to provide additional inputs to the flagellar control system in response to stress.

# Supplementary Figures

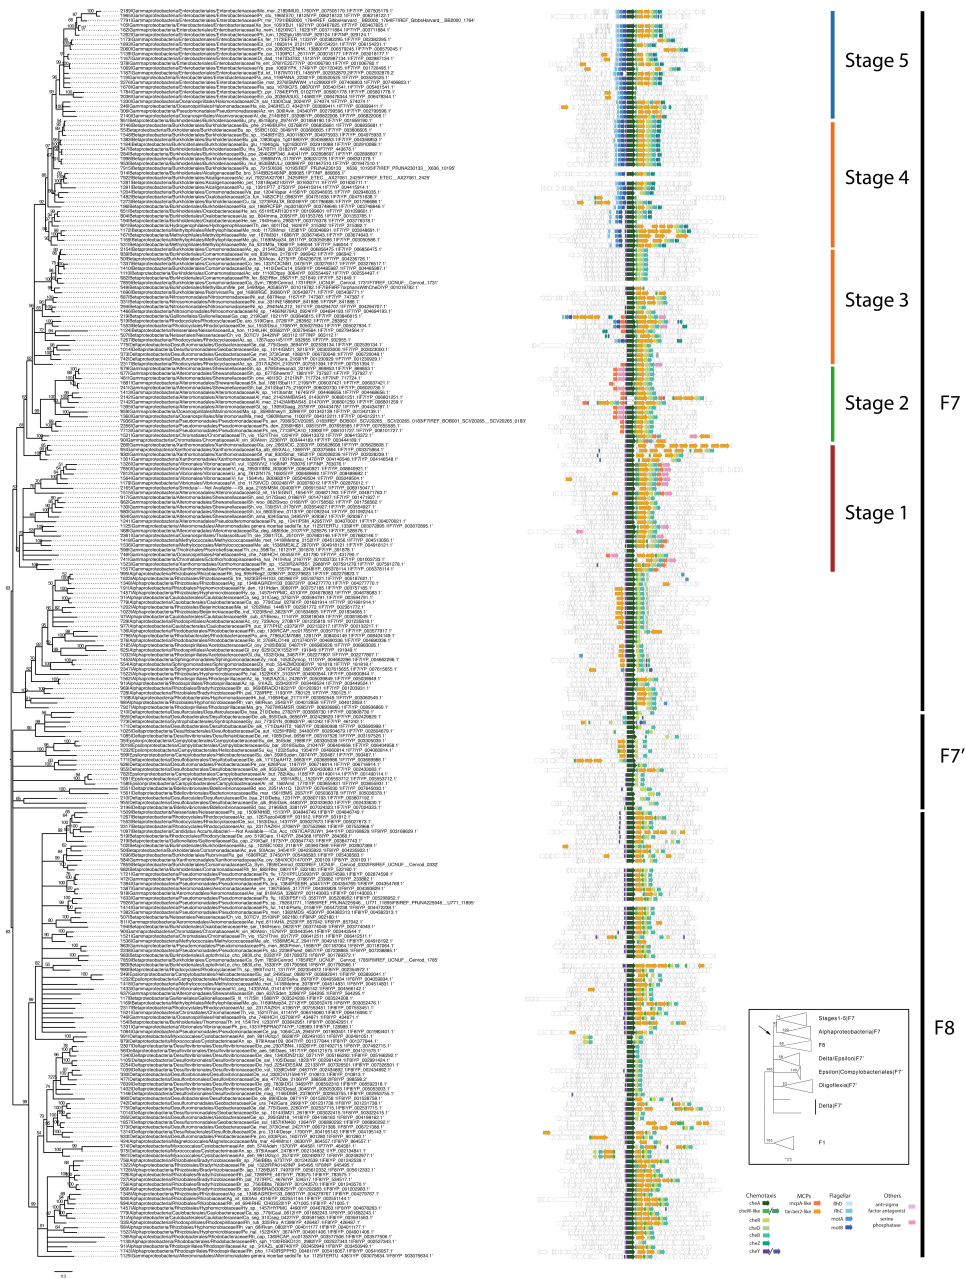

**Supplementary Figure 1:** Phylogeny of CheA, CheB and CheR concatenated alignments of F7 and F8 systems and gene neighborhood of 15 genes up and downstream from CheA. The inlet shows a CheABR tree with additional sequences from F1 systems. The tree is rooted by the common ancestor between F1 systems and the F7/F8 systems.

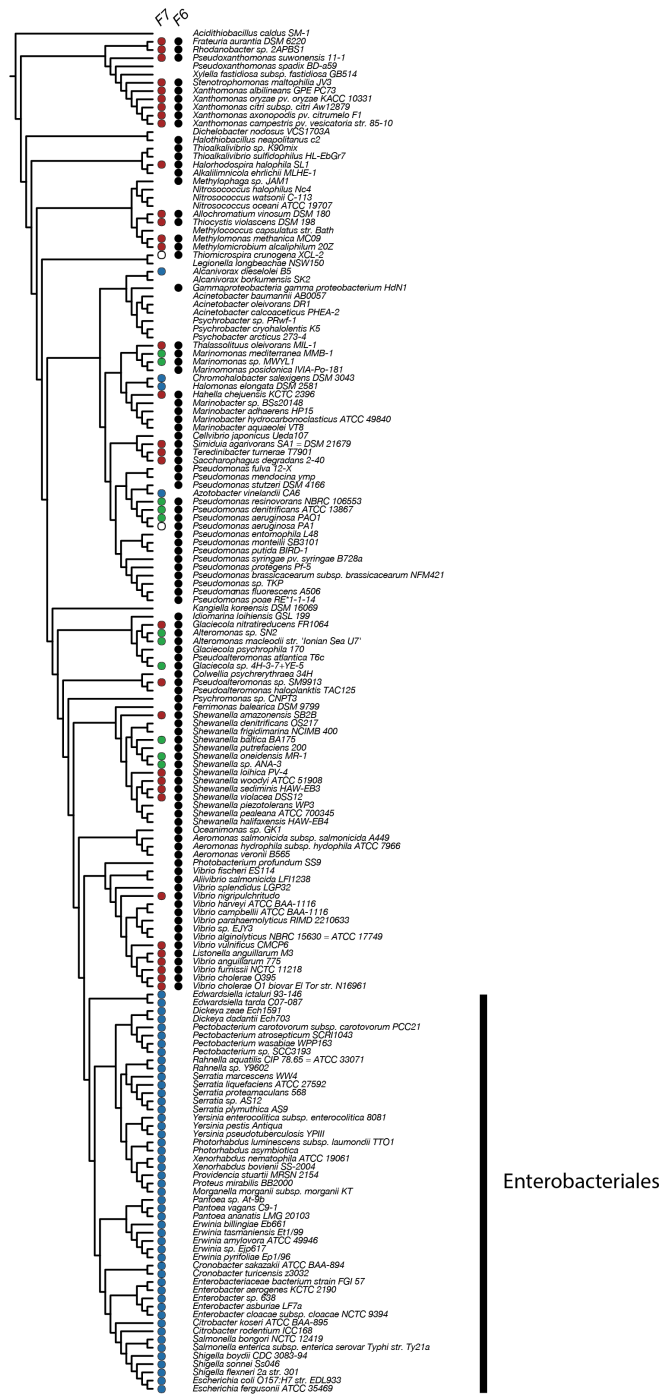

**Supplementary Figure 2:** Phylogenetic profile of the F7 and F6 systems in g-Proteobacteria shows that only organisms with F7 stage 1 (red) or stage 2 (green) systems also has F6 systems. Organisms with F7 stage 5 (blue) does not have F6 systems. Note that the distribution of stage 1 and stage 2 are mixed in the non-enteric group. Genomes with empty circles were genomes included in this part of the research but not in the analysis of classifying the F7 systems.

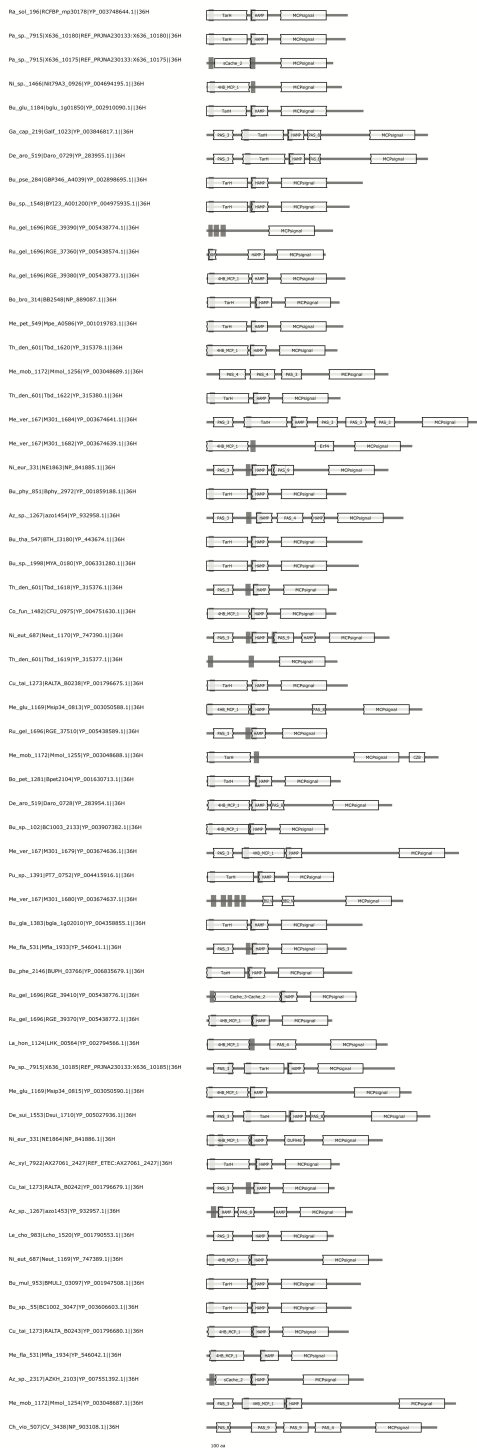

**Supplementary Figure 3:** Protein domain architecture of chemoreceptors in the gene cluster of stage 3 and 4 of F7 systems shows the high incidence of receptors with transmembrane regions and periplasmic sensory domains (TarH, Cache superfamily, 4HB\_MCP\_1).

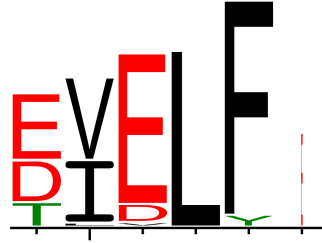

**Supplementary Figure 4:** Sequence logo of the C-terminal of McpA-like sequences.

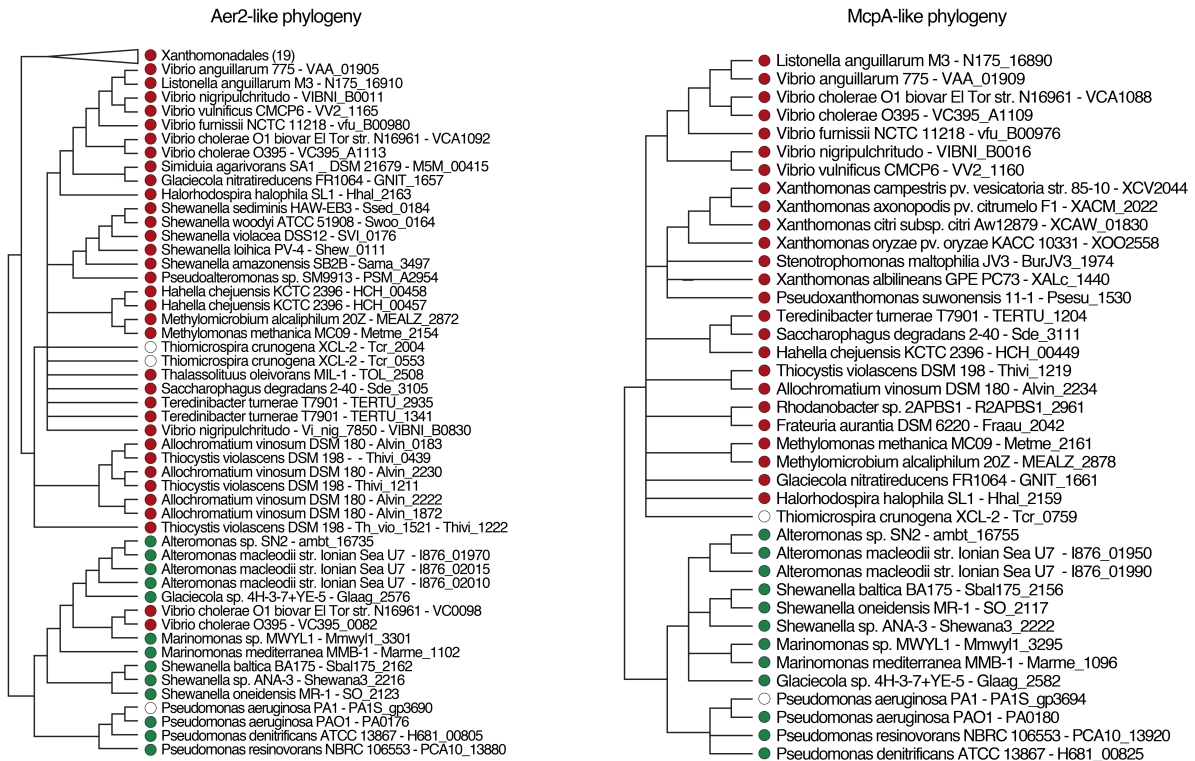

**Supplementary Figure 5:** Phylogenetic tree of Aer2-like receptors and McpA-like receptors. The tags in the tips are built using the name of the organism and the locus of the receptor. Tips with red dots belong to chemoreceptors from stage 1 and green to stage 2. The only exception to the monophyletic distribution of Aer2-like receptors were in *V. cholerae*, where an addition to the Aer2 homolog, a second, orphan 36H receptor (VC0098) was likely introduced by a recent lateral gene transfer from *Marinomonas*. Genomes with empty circles were genomes included in this part of the research but not in the analysis of classifying the F7 systems.



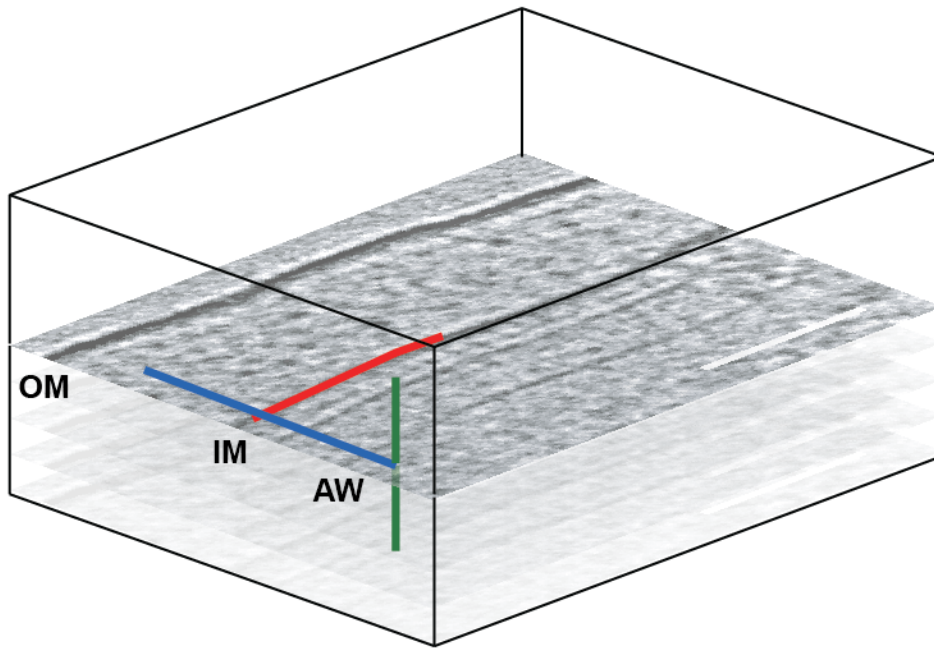

**Supplementary Figure 6:** The 1D electron density profile is a collapse of a 3D sub-volume. For each model point (red), the algorithm extends a profile perpendicular to the model points (blue). Then, it averages the intensity of the pixels perpendicular to the profile in the slices above and below (green). The final 1D profile is an average of the profiles calculated for each pixel of the model point.

## Supplementary Tables

**Supplementary Table 1:** Presence and absence of the chemosensory arrays in imaged strains of *V. cholerae*, *P. aeruginosa*, *S. oneidensis*, and *M. alcaliphilum*.

|                                                             | <b>Imaged cell poles</b> | <b>Short array</b> | <b>Tall array</b> |
|-------------------------------------------------------------|--------------------------|--------------------|-------------------|
| <b><i>Vibrio cholerae</i></b>                               |                          |                    |                   |
| Wild-type C6706                                             | 29                       | 20                 | 7                 |
| $\Delta mcp$ (VCA1088)                                      | 20                       | 19                 | 5                 |
| $\Delta F7 cheW, cheW, cheA$<br>(VCA1093, VCA1094, VCA1095) | 29                       | 18                 | 0                 |
| $\Delta mcp$ ( <i>Aer2</i> /VCA1092)                        | 27                       | 24                 | 0                 |
| <b><i>Pseudomonas aeruginosa</i></b>                        |                          |                    |                   |
| Wild -type PAO1                                             | 16                       | 7                  | 5                 |
| $\Delta F6 cheW$                                            | 15                       | 8                  | 6                 |
| $\Delta mcp$ ' <i>mcpA</i> ' (PAO180)                       | 8                        | 4                  | 2                 |
| $\Delta F7 cheW$ (PAO177)                                   | 33                       | 12                 | 0                 |
| $\Delta F7 cheA$ (PAO 178)                                  | 34                       | 24                 | 0                 |
| $\Delta mcp$ ' <i>aer2</i> ', ' <i>mcpB</i> ' (PAO176)      | 21                       | 11                 | 0                 |
| <b><i>Shewanella oneidensis MR-1</i></b>                    |                          |                    |                   |
| Chemostat growth                                            | 29                       | 20                 | 7                 |
| Batch culture growth                                        | 29                       | 18                 | 0                 |
| <b><i>Methylomicrobium alcaliphilum 20Z</i></b>             |                          |                    |                   |
| Wild-type                                                   | 8                        | 5                  | 2                 |

**Supplementary Table 2:** Chemosensory gene clusters in the genomes of *V. cholerae*, *P. aeruginosa*, *S. oneidensis* and *M. alcaliphilum*.

|                                             | <b>Classification</b> | <b>Alternative name in literature</b> | <b>Function</b>    | <b>Gene cluster</b>     |
|---------------------------------------------|-----------------------|---------------------------------------|--------------------|-------------------------|
| <b><i>Vibrio cholerae</i></b>               |                       |                                       |                    |                         |
| Cluster I                                   | F9                    | -                                     | Unknown            | VC1394-VC1405           |
| Cluster II                                  | F6                    | -                                     | Chemotaxis         | VC2059-VC2064           |
| Cluster III                                 | F7                    | -                                     | Unknown            | VCA1090-VCA1095         |
| <b><i>Pseudomonas aeruginosa</i></b>        |                       |                                       |                    |                         |
| Cluster I/V                                 | F6                    | Che I                                 | Chemotaxis         | PA1457-PA1464           |
| Cluster II                                  | F7                    | Che II                                | Unknown            | PA0173-PA0180           |
| Cluster III                                 | ACF                   | Wsp                                   | Biofilm formation  | PA3703-PA3708           |
| Cluster IV                                  | TFP                   | Chp                                   | Twitching motility | PA0410-PA0415           |
| <b><i>Shewanella oneidensis</i></b>         |                       |                                       |                    |                         |
| Cluster I                                   | F7                    | CheA-1                                | Unknown            | SO_2117-SO_2126         |
| Cluster II                                  | F6                    | CheA-3                                | Chemotaxis         | SO_3200-SO_3209         |
| <b><i>Methylomicrobium alcaliphilum</i></b> |                       |                                       |                    |                         |
| Cluster I                                   | F7                    | -                                     | Unknown            | MEALZ_2869-MEALZ_2879   |
| Cluster II                                  | F8                    | -                                     | Unknown            | MEALZ_2939 - MEALZ_2942 |
| Cluster III                                 | F6                    | -                                     | Unknown            | MEALZ_3148 - MEALZ_3158 |

**Supplementary Table 3:** Number of cells and sub-tomograms used to generate averages shown in Figure 2.

|                        | <b>Cells (tomograms)</b> | <b>Sub-tomograms</b> | <b>Pixel size (nm)</b> |
|------------------------|--------------------------|----------------------|------------------------|
| <i>P. aeruginosa</i>   | 5                        | 1113                 | 0.64                   |
| <i>V. cholerae</i>     | 6                        | 265                  | 1.3                    |
| <i>S. oneidensis</i>   | 5                        | 327                  | 1                      |
| <i>M. alcaliphilum</i> | 2                        | 1448                 | 1                      |

**Supplementary Table 4:** Locations of electron density layers in arrays. Distances are measured from the CheA/CheW baseplate in nanometers. Uncertainties reported are the expanded standard uncertainty.

| <b>Layers (F7)</b>   | <i>V. cholerae</i> | <i>P. aeruginosa</i> | <i>S. oneidensis</i> | <i>M. alcaliphilum</i> |
|----------------------|--------------------|----------------------|----------------------|------------------------|
| Inner membrane (IM)  | 38.4±1.9 nm        | 40.3±1.8 nm          | 35.5±2.7 nm          | 35.1±2.8 nm            |
| Layer 3 (L3)         | 29.5 ±1.9 nm       | 30.7±1.8 nm          | 30.7±4.3 nm          | -                      |
| Layer 2 (L2)         | 24.8±1.9 nm        | 24.0±1.8 nm          | 24.0±2.7 nm          | 25.3±4.4 nm            |
| Layer 1 (L1)         | 17.5±1.9 nm        | 17.9±2.9 nm          | 17.3±2.7 nm          | 17.4±4.4 nm            |
| Signaling Layer (SL) | -                  | 7.0±1.8 nm           | 6.7±4.3 nm           | 7.5±2.8 nm             |
| Layers (F6)          |                    |                      |                      |                        |
| Inner membrane (IM)  | 35.8±1.9 nm        | 34.5±1.8 nm          | 34.3±1.8 nm          | 35.0±2.8 nm            |

**Supplementary Table 5:** *P. aeruginosa* strains

| <b>Strain name</b> | <b>PA ORF</b> | <b>Gene</b>    |
|--------------------|---------------|----------------|
| PW1307             | PA0178        | CheA F7 system |
| PW1305             | PA0177        | CheW F7 system |
| PW1312             | PA0180        | MCPA           |
| PW3654             | PA1464        | CheW F6 system |

**Supplementary Table 6:** Cryo-Electron Tomograms used in this study available on ETDB. Tomograms can be found on ETDB by the Open Index Protocol id (OIP id).

| <b>Jensen Lab id</b> | <b>OIP id</b>                                                        | <b>Organism</b>        |
|----------------------|----------------------------------------------------------------------|------------------------|
| ab2015-06-02-1       | 6cef7c25e66ce42e4e2440490a68845a551303<br>77f7bc9e096c48fd83b47ae9cd | <i>Vibrio cholerae</i> |
| ab2015-06-02-2       | 98d93b8c8e390eb6c200fc2d30c9626cb1a7c1<br>40cd930a60eddb3a179aa8226b | <i>Vibrio cholerae</i> |

| <b>Jensen Lab id</b> | <b>OIP id</b>                                                    | <b>Organism</b>        |
|----------------------|------------------------------------------------------------------|------------------------|
| ab2015-06-02-3       | 39a5d8490ee3823eaf785268aba1593d3be05b8bf6cc029d2e0c247bb7b0a6ba | <i>Vibrio cholerae</i> |
| ab2015-06-02-5       | 2620f1ee27c5e63853bb3f3d09796b19d7bd91fddb5781daa892d68fb31be735 | <i>Vibrio cholerae</i> |
| ab2015-06-02-6       | 9ba344e00d31084d2aef8a799f3089e46ead3b28a02c0e73c5852337f67121fc | <i>Vibrio cholerae</i> |
| ab2015-06-02-7       | 1e00525c41a9faaa849befd686b70757a6f25a9ceacbcde951b6eeef99006f09 | <i>Vibrio cholerae</i> |
| ab2015-06-02-8       | 3cb8dc276fb373a99af2ee54301fcb0989eb0037b9c3c2bd21f8e035f0f98215 | <i>Vibrio cholerae</i> |
| ab2015-06-02-9       | 5739b1525b6a0e906de41a8e024e0b502f964e19193feed1a62ced0e41b5dc17 | <i>Vibrio cholerae</i> |
| ab2015-06-02-10      | 7e869e97212b3df06af70decf577ef3836c1ec4787f1cbe677da60aca3bda727 | <i>Vibrio cholerae</i> |
| ab2015-06-02-11      | 8329b3a0b5373c89d5280c42ca8aabb19a38a6ee03e5910275b82776ff8745fa | <i>Vibrio cholerae</i> |
| ab2015-06-02-12      | de04da0f550b2f37d4a0847e13b637877ed6994bb5d8d0c24c87ad9f3cf52924 | <i>Vibrio cholerae</i> |
| ab2015-06-02-13      | 4caf0202a48c92372ca3a24101d9c5e2b446fadbf80109b5d0710598a11fa3aa | <i>Vibrio cholerae</i> |
| ab2015-06-02-14      | b2f7beb0de38a1eb8d0eab4d8493616c9122931ec0490e1bb5b45474a032098f | <i>Vibrio cholerae</i> |
| ab2015-06-02-15      | bd8198a02bd66929811014f1b15a243f4705433876cb56c784bdc8fb91378c00 | <i>Vibrio cholerae</i> |
| ab2015-06-02-16      | 87c298d70069315af599618c344d80bf2fc48f44c0057002798241842b58b5c9 | <i>Vibrio cholerae</i> |
| ab2015-06-02-17      | 066cf7fae820b463b2e7405a9078e97b6de9910587458dfd904759d75fb4ed2c | <i>Vibrio cholerae</i> |
| ab2015-06-02-18      | 82fdc6778793542fad9bfe7c18a6fa972dc3bf230b2e108aa53a5807811bdad7 | <i>Vibrio cholerae</i> |
| ab2015-06-02-20      | 2524250ba11140c386c211aa14d164a166926ee9ca7af5566eedbbba29856c48 | <i>Vibrio cholerae</i> |
| ab2015-06-02-21      | 95a8202f59bdcfc9814f417aa40b3c355fc6f12cb147784d1d1665d8ccce8221 | <i>Vibrio cholerae</i> |
| ab2015-06-02-22      | 09443b1917375d0f2755c3f4c2029dc847c654efdb2e5a3df0c5938a9afaa1a9 | <i>Vibrio cholerae</i> |

| <b>Jensen Lab id</b> | <b>OIP id</b>                                                     | <b>Organism</b>        |
|----------------------|-------------------------------------------------------------------|------------------------|
| ab2015-06-02-23      | 453536f21d3074fd3f6fcae6d834c6e37335f466611e2f1842c6beeb8ee77681e | <i>Vibrio cholerae</i> |
| ab2015-06-02-24      | 03ab91b142bf62ed9c21e1da4b17e25d7c73b70cbd6a25481342d9736f2a2290  | <i>Vibrio cholerae</i> |
| ab2015-06-02-25      | 8853aea7df6d8a168b62b9db8694ad82dfa23c9b00eafb3f71b025f20cb34abd  | <i>Vibrio cholerae</i> |
| ab2015-06-02-26      | 8770b212ceddc32db6f1ae0b8a40a5eaa1ec42c31bceda0c4919b86dcde7246b  | <i>Vibrio cholerae</i> |
| ab2015-06-02-27      | e1b34b3df7aa6367398010bf8b96d5a003759a2dd71a473e45a43d598e779d29  | <i>Vibrio cholerae</i> |
| ab2015-06-02-29      | 08324bf01302b1db927045548218ff3e317aea74602363e669a187c52e234be   | <i>Vibrio cholerae</i> |
| ab2015-06-02-30      | 2eda58ca01240b7486bda36c36e36217918c89fcb1361ddd13eeda95afc4271   | <i>Vibrio cholerae</i> |
| ab2015-06-02-31      | 6b6b8ba7f2127c66614756b85d4bb0efde943cbfc305e40a3330181009bd893e  | <i>Vibrio cholerae</i> |
| ab2015-06-02-32      | 61c86c9a912eb1bcada440939a48d46e99128ffeca99578b16e00e22031f4a22  | <i>Vibrio cholerae</i> |
| ab2015-06-03-1       | 197f9f4bbc9f5fa49c4644f3f40df46cbf2b82399e8137db7799b9e030bc8455  | <i>Vibrio cholerae</i> |
| ab2015-06-03-2       | 544970e8e49ff409d4f61730c89757fdbee6fff364c1c604d355bc522c8d0f12  | <i>Vibrio cholerae</i> |
| ab2015-06-03-3       | e87e0b6e154e5dfec0120ce92e6400764ae24964aa592553e49de6187b7ffb57  | <i>Vibrio cholerae</i> |
| ab2015-06-03-4       | 20d581e5578e3156ddf96496119c1296494e062deecf45634c79f19f331368b6  | <i>Vibrio cholerae</i> |
| ab2015-06-03-5       | 10c8a0be7b87b3d95eb2d8573e782a856e493b65735aab290c0a772092d2ecfc  | <i>Vibrio cholerae</i> |
| ab2015-06-03-6       | 0c1b01aa1ed45fcb7d17500c4829f9480924fa210f9706d6a1a5da9d4dc1477   | <i>Vibrio cholerae</i> |
| ab2015-06-03-7       | 21482339f240527367c699214ba438d2b9a7ac6376d611f2d69e0f4c1d1d0039  | <i>Vibrio cholerae</i> |
| ab2015-06-03-8       | 453a055bebf6eb8d65f2154f51a568cfc3f58c36aa445ff6be7a820c0d3963e9  | <i>Vibrio cholerae</i> |
| ab2015-06-03-9       | faed3ad567cb4667d1986bb9a7869a4a9da0a9e2d016dbb6d823e15f5d1cc149  | <i>Vibrio cholerae</i> |

| <b>Jensen Lab id</b> | <b>OIP id</b>                                                    | <b>Organism</b>        |
|----------------------|------------------------------------------------------------------|------------------------|
| ab2015-06-03-10      | 1c8abd7e25085cccce2ce38fb25ff51ac70ddfc88cad18322406467298bf3e   | <i>Vibrio cholerae</i> |
| ab2015-06-03-11      | 920321536f97c55c300ad77d279265973442bd4ec0e7286a95f2d134ec384b42 | <i>Vibrio cholerae</i> |
| ab2015-06-03-12      | 9262dbfb593f79bf0c9cac6f9125326ede755dd3e4edc569b68b0fc279f84d8d | <i>Vibrio cholerae</i> |
| ab2015-06-03-13      | 72b627c7010d0ea37a8aa011925069437195c51f77e5adcf41f6a8330e75cc65 | <i>Vibrio cholerae</i> |
| ab2015-06-03-14      | 223d692a658a507a7085c75f8c757b05c1cf1d2ee8e352a1db4371f2062e3ec4 | <i>Vibrio cholerae</i> |
| ab2015-06-03-15      | c55cf52f955779f23cda1c2244e2b64315f8fbb490f10689f9c32b7a87a99512 | <i>Vibrio cholerae</i> |
| ab2015-06-03-16      | b59e667fadb1914c70ad191dad31a30a87ba416e8de4877000d1f6cb52869601 | <i>Vibrio cholerae</i> |
| ab2015-06-03-17      | 067ac5b8ce49dffe5254c958a0ef6bfd601de8778c47f17d8db6c76f2b03d882 | <i>Vibrio cholerae</i> |
| ab2015-06-03-18      | c9dd866db34f7ed34af143d2a879e5b28035fce2a4392aceb54f7824ceec0e37 | <i>Vibrio cholerae</i> |
| ab2015-06-03-19      | fabd724070997b695344be1bc4ad91faa2b2c82876f6bda65aeeee18eb39ca29 | <i>Vibrio cholerae</i> |
| ab2015-06-03-20      | 34ff16d0af7b7a6cfbe49d20981049070d2b9b9f5a1919896a839eb62dc8c6a8 | <i>Vibrio cholerae</i> |
| ab2015-06-03-21      | 4440060c9b511b30ec0b7c123b3891a3823a77a8393437862aa5344392e0be26 | <i>Vibrio cholerae</i> |
| ab2015-06-03-22      | 48c976b5ec236342fdd4ae521086e3657da4a45c4afad6003efdb44a5e8275   | <i>Vibrio cholerae</i> |
| ab2015-06-03-23      | 1c1e69acb1c51ec5655f2fc7e1296de6494c1c68785e7f4a7ce0cc651d2125c9 | <i>Vibrio cholerae</i> |
| ab2015-06-03-24      | aa070936e1aee30b373bc2d2aed88f1576cd3ed6766dbc9f92f120be46aeabe  | <i>Vibrio cholerae</i> |
| ab2015-06-03-25      | d84b38caf03c63be65666a628fa8f90aeaec8991ba29dad0b539585fbcf3b96c | <i>Vibrio cholerae</i> |
| ab2015-06-03-26      | f38ac8c272b532e7dd3e3da38b1fff38f42385a2aa55872dda24bf10720544ba | <i>Vibrio cholerae</i> |
| ab2015-06-03-27      | 9d8070fbfbab0e5bfdd555544219789104fb5dcbda613d24385c416ccd3c3158 | <i>Vibrio cholerae</i> |

| <b>Jensen Lab id</b> | <b>OIP id</b>                                                    | <b>Organism</b>        |
|----------------------|------------------------------------------------------------------|------------------------|
| ab2015-06-03-28      | bd0aaf3c9bb4904c623c2304b5ca71f3e7dbbbd15fdbe2eb481dbdb01d561986 | <i>Vibrio cholerae</i> |
| ab2015-06-03-29      | 81345effbcb7600a9f57a2f556a10f3a20a6845df3ca51ccc1d67d964ee8e21f | <i>Vibrio cholerae</i> |
| ab2015-06-04-5       | e95c286a1ca5b5b3b3b5bf0a318a30c627623d2b63b68c9991dab337ae48e8c2 | <i>Vibrio cholerae</i> |
| ab2015-06-04-6       | 79b0258243f18a1752dac35aa7e0bff1a711f791ddd0379c184e05d9d1c5dd86 | <i>Vibrio cholerae</i> |
| ab2015-06-04-7       | 6b8f4ae3d17ab82176fe1bb2c79c55d5ce757c5355323bbadc84d17a5a6f75dd | <i>Vibrio cholerae</i> |
| ab2015-06-04-8       | 18fca4c49057b64129c9dbd0f9c8be7562fcee4d5fff21a449b1fd79a5e910f8 | <i>Vibrio cholerae</i> |
| ab2015-06-04-9       | a9e50ed3ce23097a99fdaa4d949f5353bcba9f5ce3cd7a49d5f3df08d668a989 | <i>Vibrio cholerae</i> |
| ab2015-06-04-10      | 275fbd79f1fb013309e3dc4a22c607ab406b6b2a16489a508c3490ede71dac93 | <i>Vibrio cholerae</i> |
| ab2015-06-04-11      | eadc30e57a5bbceba8e69544d43debdb4d71392ef20f16c8d9a5659a2dc877a9 | <i>Vibrio cholerae</i> |
| ab2015-06-04-12      | 82b9550d3ebda9a078ece5cea3cfd02ceece06df9115d8b2d558d5b5c073f9dd | <i>Vibrio cholerae</i> |
| ab2015-06-04-13      | 204dea6006208b691ae45b1aa8a62421894c0d956a5d5bf6aaa8a3e75253345d | <i>Vibrio cholerae</i> |
| ab2015-06-04-14      | 7504bd89ddb0fd83ed926065c9d2cf7b57db0072ebb740cfefdc957f1d5c4c81 | <i>Vibrio cholerae</i> |
| ab2015-06-04-15      | 7bc4afbf390105748d85295198579497fd0d6712da0eb190eec2436cf6617349 | <i>Vibrio cholerae</i> |
| ab2015-06-04-16      | c99f6e5934554670fe2166f2f8deb7ad17f453696c914b4ca1ea88f7e009f0a4 | <i>Vibrio cholerae</i> |
| ab2015-06-04-17      | 095901997ad173f1a9cf5804cd7f92e2c95ee7bd4be14b1fa1fe94ed74e6a85d | <i>Vibrio cholerae</i> |
| ab2015-06-04-18      | 2f236dac0a263b2e3278aef8ab2aad6c7ace83bde857c6916683146369424e93 | <i>Vibrio cholerae</i> |
| ab2015-06-04-19      | b4daca6e8f77b714d01faac2b7dc9933c4617d736b0a6ef29eb9e1056c0214f8 | <i>Vibrio cholerae</i> |
| ab2015-06-04-20      | ed95dd31b7e3a97a2bedc0e8985ad471dad7c7447a7070d5d5b37b8f259da41a | <i>Vibrio cholerae</i> |



| <b>Jensen Lab id</b> | <b>OIP id</b>                                                    | <b>Organism</b>               |
|----------------------|------------------------------------------------------------------|-------------------------------|
| ab2015-06-04-21      | a41257cc5f1d3c4a84cd9645921671bff4e5b58de593872740a35172fd4102a5 | <i>Vibrio cholerae</i>        |
| ab2015-06-04-22      | 863a029fcd72521b29fa741b7a13b2df4420fcc9491a090eab709c7c7d727514 | <i>Vibrio cholerae</i>        |
| ab2015-06-04-23      | c63edc39ab954f54d3ec80607005b54739f6940f8e317c3ea88d951b0e63ed82 | <i>Vibrio cholerae</i>        |
| ab2015-06-04-24      | 5f040233e108f1d0d81448d4b7c44476947e2075742fd79ad2f0d0adf9f686fa | <i>Vibrio cholerae</i>        |
| ab2015-06-04-25      | 9a31271d398507a3e7cb0694927dbda47043f35bf8171cbd4f56df5896c7e060 | <i>Vibrio cholerae</i>        |
| ab2015-06-04-26      | 687d83b774894a40b9f35c54e0e50d2e11613d6260723ab83573e3fd6c55b309 | <i>Vibrio cholerae</i>        |
| ab2015-06-04-27      | 5cc452dfbe2e22d09dd2102b010e926f7c97355c0c209148f049292cf3b910de | <i>Vibrio cholerae</i>        |
| ab2015-06-04-28      | 49ffb9f6a24a7d07799479b844a01ed91a204f95afa28a8d59561b858d9a4d19 | <i>Vibrio cholerae</i>        |
| ab2015-06-04-29      | 38f8ed8a6cba9fdab947246fd283023b21353f166c6e41f949320a028cea2f1a | <i>Vibrio cholerae</i>        |
| ab2015-06-04-30      | 92c05f4866a31ee526bac1d95d513c9d0063e794554cdc124651fab1e8c9395  | <i>Vibrio cholerae</i>        |
| ab2015-06-04-31      | 60d87f38e11916f13cf6345b22f0b5fc567d6ecba651e7ed98c1ba23faca1a27 | <i>Vibrio cholerae</i>        |
| ab2015-06-04-32      | 2b200698dc605f2234c28d33d12a2eed4bfb6808399563791bf228fda34936e  | <i>Vibrio cholerae</i>        |
| ab2015-05-29-38      | 71b7016135114ee9988faf24a00aec627349d8610625a8925152e418ce042cb8 | <i>Pseudomonas aeruginosa</i> |
| ab2015-05-29-33      | 3bc9419d595c59d2ffb177294ceb038f5c4a40287cc1d2ff95ab43e42e22c5b5 | <i>Pseudomonas aeruginosa</i> |
| ab2015-05-29-34      | baf59323b4cd6b20e471b0587f4349bb437cc89feba37eb726c76d2b35996859 | <i>Pseudomonas aeruginosa</i> |
| ab2015-05-29-35      | 375ec0e6c3542bc3d33e7ec94c751bd1669ffe9984a4ccb8948ddc246bd02517 | <i>Pseudomonas aeruginosa</i> |
| ab2015-05-29-36      | dda73882e77f51644ba4d9fc73810f58c0789cf5ebd5c4c64108940c978d3913 | <i>Pseudomonas aeruginosa</i> |
| ab2015-05-29-37      | e0d1b4daa89125bfae9539157ab0d459e9a10b53148d17af60eb3afadf667e37 | <i>Pseudomonas aeruginosa</i> |

| <b>Jensen Lab id</b> | <b>OIP id</b>                                                    | <b>Organism</b>               |
|----------------------|------------------------------------------------------------------|-------------------------------|
| ab2015-05-29-38      | 71b7016135114ee9988faf24a00aec627349d8610625a8925152e418ce042cb8 | <i>Pseudomonas aeruginosa</i> |
| ab2015-05-29-39      | 9ff1533aa7d28d3d64439293ea263ca3ce6a6101f19c7367426d9a3bba3773e6 | <i>Pseudomonas aeruginosa</i> |
| ab2015-05-29-40      | c5f0fcf46599f6ee48fe23a59fc1d752cd64ab4031c3846ffb85d078a8bfaf5c | <i>Pseudomonas aeruginosa</i> |
| ab2015-05-29-41      | fe52314687302e52d76a76292a84a8e7730dac37451c7026621190f2185cd7df | <i>Pseudomonas aeruginosa</i> |
| ab2015-05-29-42      | fc8e9658e5fe5d5e30364f389fc123f474537bda5132fb71b12af99aaf02e7a2 | <i>Pseudomonas aeruginosa</i> |
| ab2015-05-29-43      | 433cf08b0ab2269a91f4e946b17c551e8a92a30c8c5214bc8384072fc8915b85 | <i>Pseudomonas aeruginosa</i> |
| ab2015-05-29-44      | 9162280a2e505e7a74c03de6202f084eb4b83882453525539fdf87da3905d77c | <i>Pseudomonas aeruginosa</i> |
| ab2015-05-29-45      | 9db0388f6a5482eb6cad84cd7abf0ddad7bcd4a3d741d971cc9dd3a2c378cda2 | <i>Pseudomonas aeruginosa</i> |
| ab2015-05-29-46      | 31eee1b22c3f3010a3a31df973be75ff1a126069e78bfb1dbed30cd3985330d  | <i>Pseudomonas aeruginosa</i> |
| ab2015-05-29-47      | 799edd343b37e6dff51118d39052ad7241e7c05238286bcc779c1ab9227f8a4c | <i>Pseudomonas aeruginosa</i> |
| ab2015-05-29-48      | 72025551790f3ada513cffe56e1f0971b3844f1c985e4f3e3b7579dd349aec1  | <i>Pseudomonas aeruginosa</i> |
| ab2015-05-29-49      | 76b1c8f739812662c22aee910f2e1a2bc7ac72f9c79ee19df0493c60be7f6711 | <i>Pseudomonas aeruginosa</i> |
| ab2015-05-29-50      | 2f3db7b47e7d42594be348214e07578d7ea1f08a10f8cd937bec3abb8692c6aa | <i>Pseudomonas aeruginosa</i> |
| ab2015-05-29-51      | dbe07cf9023a7c8d67cea0f6bc02eeaea93f5c2e60453ca2aa4685d8e3a53654 | <i>Pseudomonas aeruginosa</i> |
| ab2015-05-29-52      | 8f861e2f49e3b2155f99422428acb7ca764c5c22352dd6f5c411d89daaa99c8c | <i>Pseudomonas aeruginosa</i> |
| ab2015-05-29-53      | 8bbc0699df1ecaef06813ea816ded484d908679412e938d42afbb30e0f47747  | <i>Pseudomonas aeruginosa</i> |
| ab2015-05-29-54      | 87be5d50a167d3c23ad2126bc4d72844c0ed6af2848768fd1bb764ad0a05355b | <i>Pseudomonas aeruginosa</i> |
| ab2015-05-29-55      | 975a50a6ac4a0a1ce191d3f339c433b73ba15a3a8eff22b3768a9327e1ca5a21 | <i>Pseudomonas aeruginosa</i> |

| <b>Jensen Lab id</b> | <b>OIP id</b>                                                    | <b>Organism</b>               |
|----------------------|------------------------------------------------------------------|-------------------------------|
| ab2015-05-29-56      | d0799bdb371912d4370d6226ae8263e1f9bf419c49c42c16514c657f11f05f37 | <i>Pseudomonas aeruginosa</i> |
| ab2015-05-29-57      | dfd11ff2b7b5261968452f994235bece1d208b793f0c7768b883163fa0cad72c | <i>Pseudomonas aeruginosa</i> |
| ab2015-05-29-58      | 06dc2aa14271a7d5c79c6e112a3aeacc8c643246c659fab33b3bbb01fbe25356 | <i>Pseudomonas aeruginosa</i> |
| ab2015-05-29-59      | f92bcceb78dac999467e57653d9e3ab40172618fc09fb5806e64040e8a3410f5 | <i>Pseudomonas aeruginosa</i> |
| ab2015-05-29-60      | bd0b6b93ba4f3528fe3f78a789dd847ee83a6d4b08cd6e652053e72aefa6897b | <i>Pseudomonas aeruginosa</i> |
| ab2015-05-29-61      | 37d4d1c6d5229a5db3700596859b305aea3aa460d67362ba176424c9217ebf28 | <i>Pseudomonas aeruginosa</i> |
| ab2015-05-29-62      | 4e059367636fa821409e894b49151556c01d65ebe01eca3e4d4fedec6531adc7 | <i>Pseudomonas aeruginosa</i> |
| ab2014-010-14-1      | b9d6746d36ee7943e0eb19c9299214e60080c78b367558d6748820c84c2aec76 | <i>Pseudomonas aeruginosa</i> |
| ab2014-010-14-10     | c8c1989c09901dd7a257d86497a713e85a761edd2209efe0d8784d228e5b3585 | <i>Pseudomonas aeruginosa</i> |
| ab2014-010-14-11     | 18ec447aac947d6ed610084fbb9e808bdb761bf68919b853ac4946632d6c6e50 | <i>Pseudomonas aeruginosa</i> |
| ab2014-010-14-12     | 58c0a2aab1b8f0322fcc4b93838458a820fc8db74f716b53ba166ae2cbe92001 | <i>Pseudomonas aeruginosa</i> |
| ab2014-010-14-13     | 9e8108ef3cf66406b628ec973b10079efc0ca5781a05ca1a875ed6fdecc2fe02 | <i>Pseudomonas aeruginosa</i> |
| ab2014-010-14-14     | 7935084f249ec5bc222b38951cd369dab76cfab95a769d42d0eb1312cc5bb50c | <i>Pseudomonas aeruginosa</i> |
| ab2014-010-14-15     | 51b27c3cf74ce394c1d54773bd1a7d15d3379fc8db4aa2f8b9dbdbaabd71251  | <i>Pseudomonas aeruginosa</i> |
| ab2014-010-14-17     | 764f7220c7323438d65b7d4334916e9aadb0be04be1b662615be1ad1312407c6 | <i>Pseudomonas aeruginosa</i> |
| ab2014-010-14-22     | 797a818b0722e811f5ed0d6d22bdfdb158fabbcd22e8bfc7f1010ad265af8897 | <i>Pseudomonas aeruginosa</i> |
| ab2014-010-14-23     | 322a5ff8d6dda5854aaafec4883226c8463c2e9a08ce553c969ca6b98cfedef9 | <i>Pseudomonas aeruginosa</i> |
| ab2014-010-14-3      | 2c11ded42bbc0cd87dc67464474187c3c82d71742a8b50f346516a958361706a | <i>Pseudomonas aeruginosa</i> |

| <b>Jensen Lab id</b> | <b>OIP id</b>                                                    | <b>Organism</b>                      |
|----------------------|------------------------------------------------------------------|--------------------------------------|
| ab2014-010-14-4      | 20cd19c0fa4b3e32b33075348be5ab3102def5083cce6fd7ac55b01ac0cb5835 | <i>Pseudomonas aeruginosa</i>        |
| ab2014-010-14-5      | 3e6133278fc31ba361c1cd7c95c081a822d9723dc3b7f3549870510a422e2522 | <i>Pseudomonas aeruginosa</i>        |
| ab2014-010-14-6      | 3cbeac672c18cd66252b47d65f0ec124b17baf519849a6844fab4af70fbbcea1 | <i>Pseudomonas aeruginosa</i>        |
| ab2014-010-14-8      | cb237b8021a9e653613163394c11258bb3b72fe09720a977596c18478e5d43c2 | <i>Pseudomonas aeruginosa</i>        |
| ab2014-010-14-9      | 8bf9ec4e43a3e6bd11c44bb6d341d138e14b41c776e66e21a8a17d399c1c69c2 | <i>Pseudomonas aeruginosa</i>        |
| sc2014-02-14-1       | ecfe996b6c698beb104f0cf84bda7955a48c7edb6049ce2b9256cb3b1e2b85b0 | <i>Methylobacterium alcaliphylum</i> |
| sc2014-02-12-1       | 37a38f6896b2fbc3379ebba9976e69ccefd45da011b009f9fc498f40ab5b68e  | <i>Methylobacterium alcaliphylum</i> |
| sc2014-02-12-3       | 82c7e7111fad00bd9de9be253c966a0d87b3b585cf47a4e3ada52b7a90ae362f | <i>Methylobacterium alcaliphylum</i> |
| sc2014-02-12-6       | c807ab328c5bd06874ad4f9fb731fafd888f23894d00cafed1089f988407ed99 | <i>Methylobacterium alcaliphylum</i> |
| sc2014-02-12-7       | 99a62dfe3b6bedf92f6bd93916b1fe055c1abd7d4d2f781348c01ae89c45dbd5 | <i>Methylobacterium alcaliphylum</i> |
| sc2014-02-12-8       | 6ce0a323a040374567356e08c438fd42806aef88c73f105e2d9e13684d940ae8 | <i>Methylobacterium alcaliphylum</i> |
| sc2014-02-12-9       | 9e828a83fb3538f1f6f9942ea4216cd7fe20ebcc1c82ed3dba8f7e34bdc3a1e9 | <i>Methylobacterium alcaliphylum</i> |
| sc2014-02-12-12      | 262b60a13fbcd486cc7c4ac73b739ddccb23d93cf8d5d4138ae911af40f95480 | <i>Methylobacterium alcaliphylum</i> |

**Supplementary Table 7:** Atomic models used to produce the homology models used in this work

| <b>Domain(s)</b>                                          | <b>PDB code</b> | <b>Reference</b> |
|-----------------------------------------------------------|-----------------|------------------|
| HAMP( <i>A. fulgidus</i> ) + MCP_Signal( <i>E. coli</i> ) | 3ZX6            | 21               |
| PAS( <i>P. aeruginosa</i> )                               | 4HI4            | 22               |
| PAS + HAMP ( <i>P. aeruginosa</i> )                       | 3VOL            | 23               |

| <b>Domain(s)</b>                | <b>PDB code</b> | <b>Reference</b> |
|---------------------------------|-----------------|------------------|
| 3xHAMP ( <i>P. aeruginosa</i> ) | 4I3M            | 24               |

**Supplementary Table 8:** Relevant files used to build the homology models produced in this work

| <b>File</b>                          | <b>Type</b>        | <b>Description</b>                                                                          |
|--------------------------------------|--------------------|---------------------------------------------------------------------------------------------|
| 3XZ6_4I3M.pir                        | Sequence alignment | Sequence alignment used to build the 2H+S homology model                                    |
| 3XZ6_4I3M_74.pdb                     | 3D atomic model    | Best homology model from 2H+S                                                               |
| 4HI4_BD.pdb                          | 3D atomic model    | chains B and D of 4HI4 aligned with 2H+S model                                              |
| 3ZX6_4I3M_4HIH.pir                   | Sequence alignment | Sequence alignment used to build the P+2H+S homology model                                  |
| 3ZX6_4I3M_4HIH_99.pdb                | 3D atomic model    | Best homology model from P+2H+S                                                             |
| 4I3M.bio.pos.pdb                     | 3D atomic model    | Model of 4I3M positioned against 3ZX6_4I3M_4HIH_99.pdb to build the model for Aer2 (PA0176) |
| 3ZX6_4I3M_4HI4_4I3M.pir              | Sequence alignment | Sequence alignment used to build the model for Aer2 (PA0176)                                |
| Aer2Pa_3HAMP_PAS_2HAMP.B99990041.pdb | 3D atomic model    | Best Aer2 (PA0176) homology model                                                           |
| 3ZX6_4I3M_4HI4_4HI4.pir              | Sequence alignment | Sequence alignment used to build the model for Aer2-like (VCA1092)                          |
| VCA1092.B999900035.pdb               | 3D atomic model    | Best Aer2-like (VCA1092) homology model                                                     |
| 3ZX6_4I3M_4HI4_4HI4_SO.pir           | Sequence alignment |                                                                                             |

| File                                                             | Type                                                                  | Description                                                                                                                               |
|------------------------------------------------------------------|-----------------------------------------------------------------------|-------------------------------------------------------------------------------------------------------------------------------------------|
|                                                                  | used to build the model for Aer2-like (SO_2123)                       |                                                                                                                                           |
| SO_2123.B99990017.pdb                                            | 3D atomic model                                                       | Best Aer2-like (SO_2123) homology model                                                                                                   |
| hamp_sequence_for_MEALZ.linsi.fa                                 | Sequence alignment                                                    | Sequence alignment of HAMP domains in the group of Pseudomonas group similar to the 3 HAMPs in 4I3M and the C-terminal HAMP of MEALZ_2872 |
| RAxML_bipartitions_50coll.hamp_sequence_for_MEALZ.linsi.rec.tree | Phylogenetic Tree                                                     | The tree with maximum likelihood based on hamp_sequence_for_MEALZ.linsi.fa                                                                |
| 4I3M.bio.HAMP2.withtail4alignment.pdb                            | 3D atomic model                                                       | Model of the second HAMP of 4I3M with part of the helix connecting to the third HAMP.                                                     |
| 4I3M.bio.HAMP2.alnMEALZ.pdb                                      | 23D atomic model                                                      | Model of the second HAMP of 4I3M without part of the helix connecting to the third HAMP.                                                  |
| 3ZX6_4I3M_4HI4_HAMP2_MEALZ.pir                                   | Sequence alignment used to build the model for Aer2-like (MEALZ_2872) |                                                                                                                                           |
| MEALZ_2872_wHAMP.B99990020.pdb                                   | 3D atomic model                                                       | Best Aer2-like (MEALZ_2872) homology model                                                                                                |

**Supplementary Table 9:** 310 randomly selected non-redundant  $\gamma$ -Proteobacteria genomes used in this work. The presence of an F7 system is indicated.

| <b>Genome</b>                                               | <b>has F7</b> |
|-------------------------------------------------------------|---------------|
| <i>Acidithiobacillus caldus</i> SM-1                        | no            |
| <i>Acidithiobacillus ferrivorans</i> SS3                    | no            |
| <i>Acidithiobacillus</i> sp. GGI-221                        | no            |
| <i>Acidithiobacillus thiooxidans</i> ATCC 19377             | no            |
| <i>Acinetobacter baumannii</i> AB5075                       | no            |
| <i>Acinetobacter bereziniae</i> LMG 1003                    | no            |
| <i>Acinetobacter calcoaceticus</i> RUH2202                  | no            |
| <i>Acinetobacter haemolyticus</i> ATCC 19194                | no            |
| <i>Acinetobacter johnsonii</i> SH046                        | no            |
| <i>Acinetobacter junii</i> SH205                            | no            |
| <i>Acinetobacter lwoffii</i> SH145                          | no            |
| <i>Acinetobacter nosocomialis</i> Ab22222                   | no            |
| <i>Acinetobacter oleivorans</i> DR1                         | no            |
| <i>Acinetobacter parvus</i> DSM 16617 = CIP 108168          | no            |
| <i>Acinetobacter radioresistens</i> DSM 6976 = NBRC 102413  | no            |
| <i>Acinetobacter</i> sp. NCTC 10304                         | no            |
| <i>Acinetobacter ursingii</i> DSM 16037 = CIP 107286        | no            |
| <i>Aeromonas aquariorum</i> AAK1                            | no            |
| <i>Aeromonas caviae</i> Ae398                               | no            |
| <i>Aeromonas hydrophila</i> SSU                             | no            |
| <i>Aeromonas media</i> WS                                   | no            |
| <i>Aeromonas salmonicida</i> subsp. <i>salmonicida</i> A449 | no            |
| <i>Aeromonas veronii</i> AER397                             | no            |
| <i>Alcanivorax borkumensis</i> SK2                          | no            |
| <i>Alcanivorax dieselolei</i> B5                            | yes           |
| <i>Alcanivorax hongdengensis</i> A-11-3                     | no            |

| <b>Genome</b>                               | <b>has F7</b> |
|---------------------------------------------|---------------|
| <i>Alcanivorax pacificus</i> W11-5          | yes           |
| <i>Alcanivorax</i> sp. DG881                | no            |
| <i>Aliivibrio salmonicida</i> LF11238       | no            |
| <i>Alishewanella aestuarii</i> B11          | no            |
| <i>Alishewanella agri</i> BL06              | no            |
| <i>Alishewanella jeotgali</i> KCTC 22429    | no            |
| <i>Alkalilimnicola ehrlichii</i> MLHE-1     | no            |
| <i>Allochromatium vinosum</i> DSM 180       | yes           |
| <i>Alteromonadales bacterium</i> TW-7       | yes           |
| <i>Alteromonas mediterranea</i> MED64       | no            |
| <i>Alteromonas</i> sp. SN2                  | yes           |
| <i>Azotobacter vinelandii</i> DJ            | yes           |
| <i>Beggiatoa alba</i> B18LD                 | yes           |
| <i>Beggiatoa</i> sp. SS                     | yes           |
| <i>Cardiobacterium hominis</i> ATCC 15826   | no            |
| <i>Cardiobacterium valvarum</i> F0432       | no            |
| <i>Cellvibrio japonicus</i> Ueda107         | no            |
| <i>Cellvibrio</i> sp. BR                    | yes           |
| <i>Chromohalobacter salexigens</i> DSM 3043 | yes           |
| <i>Citrobacter freundii</i> 4_7_47CFAA      | yes           |
| <i>Citrobacter koseri</i> ATCC BAA-895      | yes           |
| <i>Citrobacter rodentium</i> ICC168         | yes           |
| <i>Citrobacter</i> sp. 30_2                 | yes           |
| <i>Citrobacter youngae</i> ATCC 29220       | yes           |
| <i>Colwellia psychrerythraea</i> 34H        | no            |
| <i>Cronobacter sakazakii</i> ES15           | yes           |



| <b>Genome</b>                                         | <b>has F7</b> |
|-------------------------------------------------------|---------------|
| <i>Cronobacter turicensis</i> z3032                   | yes           |
| <i>Dichelobacter nodosus</i> VCS1703A                 | no            |
| <i>Dickeya dadantii</i> Ech703                        | yes           |
| <i>Dickeya zea</i> Ech1591                            | yes           |
| <i>Ectothiorhodospira</i> sp. PHS-1                   | yes           |
| <i>Edwardsiella ictaluri</i> 93-146                   | yes           |
| <i>Edwardsiella tarda</i> ATCC 23685                  | yes           |
| <i>Endoriftia persephone</i> 'Hot96_1+Hot96_2'        | no            |
| <i>Enhydrobacter aerosaccus</i> SK60                  | no            |
| <i>Enterobacter asburiae</i> LF7a                     | yes           |
| <i>Enterobacter cancerogenus</i> ATCC 35316           | yes           |
| <i>Enterobacter cloacae</i> subsp. <i>cloacae</i> GS1 | yes           |
| <i>Enterobacter hormaechei</i> ATCC 49162             | yes           |
| <i>Enterobacter radicincitans</i> DSM 16656           | yes           |
| <i>Enterobacter</i> sp. 638                           | yes           |
| <i>Enterobacteriaceae</i> bacterium 9_2_54FAA         | yes           |
| <i>Erwinia amylovora</i> CFBP1430                     | yes           |
| <i>Erwinia billingiae</i> Eb661                       | yes           |
| <i>Erwinia pyrifoliae</i> Ep1/96                      | yes           |
| <i>Erwinia</i> sp. Ejp617                             | yes           |
| <i>Erwinia tasmaniensis</i> Et1/99                    | yes           |
| <i>Escherichia albertii</i> TW11588                   | yes           |
| <i>Escherichia coli</i> KTE229                        | yes           |
| <i>Escherichia fergusonii</i> ECD227                  | yes           |
| <i>Escherichia hermannii</i> NBRC 105704              | yes           |
| <i>Escherichia</i> sp. TW09276                        | yes           |

| <b>Genome</b>                                    | <b>has F7</b> |
|--------------------------------------------------|---------------|
| <i>Ferrimonas balearica</i> DSM 9799             | no            |
| <i>Fluoribacter dumoffii</i> Tex-KL              | no            |
| <i>Frateuria aurantia</i> DSM 6220               | yes           |
| <i>Gallaecimonas xiamenensis</i> 3-C-1           | yes           |
| <i>Glaciecola agarilytica</i> NO2                | yes           |
| <i>Glaciecola arctica</i> BSs20135               | no            |
| <i>Glaciecola chathamensis</i> S18K6             | yes           |
| <i>Glaciecola lipolytica</i> E3                  | no            |
| <i>Glaciecola mesophila</i> KMM 241              | no            |
| <i>Glaciecola nitratireducens</i> FR1064         | yes           |
| <i>Glaciecola pallidula</i> DSM 14239 = ACAM 615 | yes           |
| <i>Glaciecola polaris</i> LMG 21857              | no            |
| <i>Glaciecola psychrophila</i> 170               | no            |
| <i>Glaciecola</i> sp. 4H-3-7+YE-5                | yes           |
| <i>Grimontia hollisae</i> CIP 101886             | yes           |
| <i>Grimontia</i> sp. AK16                        | yes           |
| <i>Hafnia alvei</i> ATCC 51873                   | yes           |
| <i>Hahella chejuensis</i> KCTC 2396              | yes           |
| <i>Halomonas boliviensis</i> LC1                 | yes           |
| <i>Halomonas elongata</i> DSM 2581               | yes           |
| <i>Halomonas</i> sp. GFAJ-1                      | yes           |
| <i>Halomonas titanicae</i> BH1                   | yes           |
| <i>Halorhodospira halophila</i> SL1              | yes           |
| <i>Halothiobacillus neapolitanus</i> c2          | no            |
| <i>Hydrocarboniphaga effusa</i> AP103            | yes           |
| <i>Idiomarina loihiensis</i> L2TR                | no            |

| <b>Genome</b>                                                 | <b>has F7</b> |
|---------------------------------------------------------------|---------------|
| <i>Idiomarina xiamenensis</i> 10-D-4                          | no            |
| <i>Kangiella koreensis</i> DSM 16069                          | no            |
| <i>Klebsiella aerogenes</i> KCTC 2190                         | yes           |
| <i>Klebsiella pneumoniae</i> subsp. <i>pneumoniae</i> HS11286 | no            |
| <i>Legionella drancourtii</i> LLAP12                          | yes           |
| <i>Legionella longbeachae</i> NSW150                          | no            |
| <i>Legionella pneumophila</i> subsp. <i>pneumophila</i>       | no            |
| <i>Listonella anguillarum</i> M3                              | yes           |
| <i>Marichromatium purpuratum</i> 984                          | yes           |
| <i>Marinobacter adhaerens</i> HP15                            | no            |
| <i>Marinobacter algicola</i> DG893                            | no            |
| <i>Marinobacter hydrocarbonoclasticus</i> ATCC 49840          | no            |
| <i>Marinobacter hydrocarbonoclasticus</i> VT8                 | no            |
| <i>Marinobacter manganoxydans</i> MnI7-9                      | no            |
| <i>Marinobacter santoriniensis</i> NKSG1                      | no            |
| <i>Marinobacter</i> sp. ELB17                                 | no            |
| <i>Marinobacterium stanieri</i> S30                           | yes           |
| <i>Marinomonas mediterranea</i> MMB-1                         | yes           |
| <i>Marinomonas posidonica</i> IVIA-Po-181                     | no            |
| <i>Marinomonas</i> sp. MWYL1                                  | yes           |
| <i>Methylobacter tundripaludum</i> SV96                       | yes           |
| <i>Methylococcus capsulatus</i> str. Bath                     | no            |
| <i>Methylomicrobium album</i> BG8                             | yes           |
| <i>Methylomicrobium alcaliphilum</i> 20Z                      | yes           |
| <i>Methylomonas methanica</i> MC09                            | yes           |
| <i>Methylophaga aminisulfidivorans</i> MP                     | yes           |

| <b>Genome</b>                                                           | <b>has F7</b> |
|-------------------------------------------------------------------------|---------------|
| <i>Methylophaga frappieri</i>                                           | no            |
| <i>Methylophaga lonarensis</i> MPL                                      | no            |
| <i>Methylophaga thiooxydans</i> DMS010                                  | no            |
| <i>Moraxella macacae</i> 0408225                                        | no            |
| <i>Morganella morganii</i> subsp. <i>morganii</i> KT                    | yes           |
| <i>Moritella</i> sp. PE36                                               | yes           |
| <i>Nitrosococcus halophilus</i> Nc 4                                    | no            |
| <i>Nitrosococcus oceani</i> ATCC 19707                                  | no            |
| <i>Nitrosococcus watsonii</i> C-113                                     | no            |
| <i>Oceanimonas</i> sp. GK1                                              | no            |
| <i>Pantoea agglomerans</i> 299R                                         | yes           |
| <i>Pantoea ananatis</i> LMG 20103                                       | yes           |
| <i>Pantoea</i> sp. aB                                                   | yes           |
| <i>Pantoea stewartii</i> subsp. <i>stewartii</i> DC283                  | yes           |
| <i>Pantoea vagans</i> C9-1                                              | yes           |
| <i>Pectobacterium atrosepticum</i> SCRI1043                             | yes           |
| <i>Pectobacterium carotovorum</i> subsp. <i>brasiliensis</i> PBR1692    | yes           |
| <i>Pectobacterium</i> sp. SCC3193                                       | yes           |
| <i>Pectobacterium wasabiae</i> CFBP 3304                                | yes           |
| <i>Photobacterium damsela</i> subsp. <i>damsela</i> CIP 102761          | no            |
| <i>Photobacterium leiognathi</i> subsp. <i>mandapamensis</i> svers.1.1. | no            |
| <i>Photobacterium profundum</i> SS9                                     | no            |
| <i>Photobacterium</i> sp. AK15                                          | no            |
| <i>Photorhabdus asymbiotica</i>                                         | yes           |
| <i>Photorhabdus luminescens</i> subsp. <i>laumondii</i> TTO1            | yes           |
| <i>Proteus mirabilis</i> WGLW6                                          | yes           |

| <b>Genome</b>                                                         | <b>has F7</b> |
|-----------------------------------------------------------------------|---------------|
| <i>Proteus penneri</i> ATCC 35198                                     | yes           |
| <i>Providencia alcalifaciens</i> DSM 30120                            | yes           |
| <i>Providencia burhodogranariea</i> DSM 19968                         | yes           |
| <i>Providencia rettgeri</i> Dmel1                                     | no            |
| <i>Providencia rustigianii</i> DSM 4541                               | yes           |
| <i>Providencia stuartii</i> ATCC 25827                                | yes           |
| <i>Pseudoalteromonas arctica</i> A 37-1-2                             | no            |
| <i>Pseudoalteromonas atlantica</i> T6c                                | no            |
| <i>Pseudoalteromonas citrea</i> NCIMB 1889                            | yes           |
| <i>Pseudoalteromonas haloplanktis</i> ANT/505                         | yes           |
| <i>Pseudoalteromonas luteoviolacea</i> B = ATCC 29581                 | yes           |
| <i>Pseudoalteromonas marina</i> mano4                                 | yes           |
| <i>Pseudoalteromonas piscicida</i> JCM 20779                          | yes           |
| <i>Pseudoalteromonas rubra</i> ATCC 29570                             | yes           |
| <i>Pseudoalteromonas</i> sp. Bsw20308                                 | yes           |
| <i>Pseudoalteromonas spongiae</i> UST010723-006                       | yes           |
| <i>Pseudoalteromonas undina</i> NCIMB 2128                            | yes           |
| <i>Pseudomonas aeruginosa</i> LESB58                                  | yes           |
| <i>Pseudomonas avellanae</i> BPIC 631                                 | no            |
| <i>Pseudomonas brassicacearum</i> subsp. <i>brassicacearum</i> NFM421 | no            |
| <i>Pseudomonas denitrificans</i> ATCC 13867                           | yes           |
| <i>Pseudomonas entomophila</i> L48                                    | no            |
| <i>Pseudomonas extremaustralis</i> 14-3 substr. 14-3b                 | no            |
| <i>Pseudomonas fluorescens</i> F113                                   | no            |
| <i>Pseudomonas fragi</i> A22                                          | no            |
| <i>Pseudomonas fulva</i> 12-X                                         | no            |

| <b>Genome</b>                                             | <b>has F7</b> |
|-----------------------------------------------------------|---------------|
| <i>Pseudomonas fuscovaginae</i> UPB0736                   | no            |
| <i>Pseudomonas geniculata</i> N1                          | yes           |
| <i>Pseudomonas mendocina</i> ymp                          | no            |
| <i>Pseudomonas monteilii</i> SB3078                       | no            |
| <i>Pseudomonas poae</i> RE*1-1-14                         | no            |
| <i>Pseudomonas protegens</i> CHA0                         | no            |
| <i>Pseudomonas pseudoalcaligenes</i> KF707                | yes           |
| <i>Pseudomonas psychrotolerans</i> L19                    | no            |
| <i>Pseudomonas putida</i> GB-1                            | no            |
| <i>Pseudomonas resinovorans</i> NBRC 106553               | yes           |
| <i>Pseudomonas</i> sp. TKP                                | no            |
| <i>Pseudomonas stutzeri</i> KOS6                          | no            |
| <i>Pseudomonas syringae</i> pv. <i>phaseolicola</i> 1448A | no            |
| <i>Pseudomonas viridiflava</i> UASWS0038                  | no            |
| <i>Pseudoxanthomonas spadix</i> BD-a59                    | no            |
| <i>Pseudoxanthomonas suwonensis</i> 11-1                  | yes           |
| <i>Psychrobacter arcticus</i> 273-4                       | no            |
| <i>Psychrobacter cryohalolentis</i> K5                    | no            |
| <i>Psychrobacter</i> sp. PRwf-1                           | no            |
| <i>Psychromonas</i> sp. CNPT3                             | no            |
| <i>Rahnella aquatilis</i> CIP 78.65 = ATCC 33071          | yes           |
| <i>Rahnella</i> sp. Y9602                                 | yes           |
| <i>Rheinheimera nanhaiensis</i> E407-8                    | no            |
| <i>Rheinheimera</i> sp. A13L                              | no            |
| <i>Rhodanobacter fulvus</i> Jip2                          | yes           |
| <i>Rhodanobacter</i> sp. 116-2                            | no            |

| <b>Genome</b>                                                                         | <b>has F7</b> |
|---------------------------------------------------------------------------------------|---------------|
| <i>Rhodanobacter spathiphylli</i> B39                                                 | no            |
| <i>Rhodanobacter thiooxydans</i> LCS2                                                 | yes           |
| <i>Saccharophagus degradans</i> 2-40                                                  | yes           |
| <i>Salinisphaera shabanensis</i> E1L3A                                                | yes           |
| <i>Salmonella bongori</i> N268-08                                                     | yes           |
| <i>Salmonella enterica</i> subsp. <i>enterica</i> serovar <i>Gallinarum</i> str. 9184 | yes           |
| <i>Serratia liquefaciens</i> ATCC 27592                                               | yes           |
| <i>Serratia marcescens</i> VGH107                                                     | yes           |
| <i>Serratia odorifera</i> 4Rx13                                                       | yes           |
| <i>Serratia plymuthica</i> S13                                                        | yes           |
| <i>Serratia proteamaculans</i> 568                                                    | yes           |
| <i>Serratia</i> sp. AS13                                                              | yes           |
| <i>Shewanella amazonensis</i> SB2B                                                    | yes           |
| <i>Shewanella baltica</i> OS155                                                       | yes           |
| <i>Shewanella benthica</i> KT99                                                       | yes           |
| <i>Shewanella denitrificans</i> OS217                                                 | no            |
| <i>Shewanella frigidimarina</i> NCIMB 400                                             | no            |
| <i>Shewanella halifaxensis</i> HAW-EB4                                                | no            |
| <i>Shewanella loihica</i> PV-4                                                        | yes           |
| <i>Shewanella oneidensis</i> MR-1                                                     | yes           |
| <i>Shewanella pealeana</i> ATCC 700345                                                | no            |
| <i>Shewanella piezotolerans</i> WP3                                                   | no            |
| <i>Shewanella putrefaciens</i> CN-32                                                  | no            |
| <i>Shewanella sediminis</i> HAW-EB3                                                   | yes           |
| <i>Shewanella</i> sp. MR-4                                                            | yes           |
| <i>Shewanella violacea</i> DSS12                                                      | yes           |

| <b>Genome</b>                                  | <b>has F7</b> |
|------------------------------------------------|---------------|
| <i>Shewanella woodyi</i> ATCC 51908            | yes           |
| <i>Shigella boydii</i> CDC 3083-94             | yes           |
| <i>Shigella dysenteriae</i> 1617               | no            |
| <i>Shigella flexneri</i> 4343-70               | yes           |
| <i>Shigella sonnei</i> Ss046                   | yes           |
| <i>Shigella</i> sp. D9                         | yes           |
| <i>Simiduia agarivorans</i> SAI = DSM 21679    | yes           |
| <i>Stenotrophomonas maltophilia</i> K279a      | yes           |
| <i>Stenotrophomonas</i> sp. SKA14              | yes           |
| <i>Teredinibacter turnerae</i> T7901           | yes           |
| <i>Thalassolituus oleivorans</i> MIL-1         | yes           |
| <i>Thioalkalimicrobium aerophilum</i> AL3      | yes           |
| <i>Thioalkalivibrio</i> sp. K90mix             | no            |
| <i>Thioalkalivibrio sulfidiphilus</i> HL-EbGr7 | no            |
| <i>Thiocapsa marina</i> 5811                   | no            |
| <i>Thiocystis violascens</i> DSM 198           | yes           |
| <i>Thiomicrospira crunogena</i> XCL-2          | yes           |
| <i>Thiorhodococcus drewsii</i> AZ1             | yes           |
| <i>Thiorhodospira sibirica</i> ATCC 700588     | yes           |
| <i>Thiorhodovibrio</i> sp. 970                 | no            |
| <i>Thiothrix nivea</i> DSM 5205                | no            |
| <i>Vibrio alginolyticus</i> 40B                | no            |
| <i>Vibrio anguillarum</i> 775                  | yes           |
| <i>Vibrio brasiliensis</i> LMG 20546           | yes           |
| <i>Vibrio campbellii</i> CAIM 519 = NBRC 15631 | no            |
| <i>Vibrio caribbenthicus</i> ATCC BAA-2122     | no            |



| <b>Genome</b>                                                      | <b>has F7</b> |
|--------------------------------------------------------------------|---------------|
| <i>Vibrio cholerae</i> HC-23A1                                     | no            |
| <i>Vibrio coralliilyticus</i> ATCC BAA-450                         | yes           |
| <i>Vibrio fischeri</i> MJ11                                        | no            |
| <i>Vibrio furnissii</i> CIP 102972                                 | yes           |
| <i>Vibrio harveyi</i> 1DA3                                         | no            |
| <i>Vibrio ichthyoenteri</i> ATCC 700023                            | no            |
| <i>Vibrio metschnikovii</i> CIP 69.14                              | no            |
| <i>Vibrio mimicus</i> MB451                                        | yes           |
| <i>Vibrio nigripulchritudo</i> ATCC 27043                          | yes           |
| <i>Vibrio ordalii</i> ATCC 33509                                   | yes           |
| <i>Vibrio orientalis</i> CIP 102891 = ATCC 33934                   | yes           |
| <i>Vibrio parahaemolyticus</i> O1:Kuk str. FDA_R31                 | no            |
| <i>Vibrio rotiferianus</i> DAT722                                  | no            |
| <i>Vibrio scophthalmi</i> LMG 19158                                | no            |
| <i>Vibrio shilonii</i> AK1                                         | no            |
| <i>Vibrio sinaloensis</i> DSM 21326                                | yes           |
| <i>Vibrio</i> sp. HENC-01                                          | no            |
| <i>Vibrio splendidus</i> ATCC 33789                                | no            |
| <i>Vibrio tubiashii</i> NCIMB 1337 = ATCC 19106                    | yes           |
| <i>Vibrio vulnificus</i> MO6-24/O                                  | yes           |
| <i>Vibrionales</i> bacterium SWAT-3                                | no            |
| <i>Wohlfahrtiimonas chitiniclastica</i> SH04                       | no            |
| <i>Xanthomonas albilineans</i> GPE PC73                            | yes           |
| <i>Xanthomonas axonopodis</i> pv. <i>malvacearum</i> str. GSPB2388 | yes           |
| <i>Xanthomonas campestris</i> pv. <i>musacearum</i> NCPPB 4381     | yes           |
| <i>Xanthomonas citri</i> subsp. <i>citri</i> Aw12879               | yes           |

| <b>Genome</b>                                                         | <b>has F7</b> |
|-----------------------------------------------------------------------|---------------|
| <i>Xanthomonas fuscans</i> subsp. <i>aurantifolii</i> str. ICPB 10535 | yes           |
| <i>Xanthomonas gardneri</i> ATCC 19865                                | yes           |
| <i>Xanthomonas oryzae</i> pv. <i>oryzicola</i> BLS256                 | yes           |
| <i>Xanthomonas perforans</i> 91-118                                   | yes           |
| <i>Xanthomonas sacchari</i> NCPPB 4393                                | yes           |
| <i>Xanthomonas translucens</i> DAR61454                               | yes           |
| <i>Xanthomonas vesicatoria</i> ATCC 35937                             | yes           |
| <i>Xenorhabdus bovienii</i> SS-2004                                   | yes           |
| <i>Xenorhabdus nematophila</i> ATCC 19061                             | yes           |
| <i>Xylella fastidiosa</i> Temecula1                                   | no            |
| <i>Yersinia aldovae</i> ATCC 35236                                    | yes           |
| <i>Yersinia bercovieri</i> ATCC 43970                                 | yes           |
| <i>Yersinia enterocolitica</i> subsp. <i>palaearctica</i> Y11         | yes           |
| <i>Yersinia frederiksenii</i> ATCC 33641                              | yes           |
| <i>Yersinia intermedia</i> ATCC 29909                                 | yes           |
| <i>Yersinia kristensenii</i> ATCC 33638                               | yes           |
| <i>Yersinia mollaretii</i> ATCC 43969                                 | yes           |
| <i>Yersinia pestis</i> PY-16                                          | yes           |
| <i>Yersinia pseudotuberculosis</i> PBI/+                              | yes           |
| <i>Yersinia rohdei</i> ATCC 43380                                     | yes           |
| <i>Yersinia ruckeri</i> ATCC 29473                                    | yes           |
| <i>Yokenella regensburgei</i> ATCC 43003                              | yes           |
| endosymbiont of <i>Riftia pachyptila</i> (vent Ph05)                  | yes           |
| gamma proteobacterium HdN1                                            | no            |

**Supplementary Table 10:** Genomes used in phylogenetic profiles.

### **Genomes imaged in this study**

---

*Methylobacterium alcaliphilum* 20Z

---

*Pseudomonas aeruginosa* PAO1

---

*Shewanella oneidensis* MR-1

---

*Vibrio cholerae* O1 biovar El Tor str. N16961

### **Gamma-Proteobacteria**

---

*Acinetobacter baumannii* AB0057

---

*Acinetobacter calcoaceticus* PHEA-2

---

*Acinetobacter oleivorans* DR1

---

*Aeromonas hydrophila* subsp. *hydrophila* ATCC 7966

---

*Aeromonas salmonicida* subsp. *salmonicida* A449

---

*Aeromonas veronii* B565

---

*Alcanivorax borkumensis* SK2

---

*Alcanivorax dieselolei* B5

---

*Aliivibrio salmonicida* LF11238

---

*Alkalilimnicola ehrlichii* MLHE-1

---

*Allochromatium vinosum* DSM 180

---

*Alteromonas macleodii* str. 'Ionian Sea U7'

---

*Alteromonas* sp. SN2

---

*Azotobacter vinelandii* CA6

---

*Cellvibrio japonicus* Ueda107

---

*Chromohalobacter salexigens* DSM 3043

---

*Citrobacter koseri* ATCC BAA-895

---

*Citrobacter rodentium* ICC168

---

*Colwellia psychrerythraea* 34H

---

*Cronobacter sakazakii* ATCC BAA-894

---

*Cronobacter turicensis* z3032

## **Gamma-Proteobacteria**

---

---

*Dichelobacter nodosus* VCS1703A

---

*Dickeya dadantii* Ech703

---

*Dickeya zeae* Ech1591

---

*Edwardsiella ictaluri* 93-146

---

*Edwardsiella tarda* C07-087

---

*Enterobacter aerogenes* KCTC 2190

---

*Enterobacter asburiae* LF7a

---

*Enterobacter cloacae* subsp. *cloacae* NCTC 9394

---

*Enterobacter* sp. 638

---

*Enterobacteriaceae* bacterium strain FGI 57

---

*Erwinia amylovora* ATCC 49946

---

*Erwinia billingiae* Eb661

---

*Erwinia pyrifoliae* Ep1/96

---

*Erwinia* sp. Ejp617

---

*Erwinia tasmaniensis* Et1/99

---

*Escherichia coli* O157:H7 str. EDL933

---

*Escherichia fergusonii* ATCC 35469

---

*Ferrimonas balearica* DSM 9799

---

*Frateuria aurantia* DSM 6220

---

*Gammaproteobacteria* gamma proteobacterium HdN

---

*Glaciecola nitratireducens* FR1064

---

*Glaciecola psychrophila* 170

---

*Glaciecola* sp. 4H-3-7+YE-5

---

*Hahella chejuensis* KCTC 2396

---

*Halomonas elongata* DSM 2581

---

*Halorhodospira halophila* SL1

---

## **Gamma-Proteobacteria**

---

*Halothiobacillus neapolitanus* c2

---

*Herminiimonas arsenicoxydans*

---

*Idiomarina loihiensis* GSL 199

---

*Kangiella koreensis* DSM 16069

---

*Legionella longbeachae* NSW150

---

*Listonella anguillarum* M3

---

*Marinobacter adhaerens* HP15

---

*Marinobacter aquaeolei* VT8

---

*Marinobacter hydrocarbonoclasticus* ATCC 49840

---

*Marinobacter* sp. BSs20148

---

*Marinomonas mediterranea* MMB-1

---

*Marinomonas posidonica* IVIA-Po-181

---

*Marinomonas* sp. MWYL1

---

*Methylococcus capsulatus* str. Bath

---

*Methylomonas methanica* MC09

---

*Methylophaga* sp. JAM1

---

*Morganella morgani* subsp. *morgani* KT

---

*Nitrosococcus halophilus* Nc4

---

*Nitrosococcus oceani* ATCC 19707

---

*Nitrosococcus watsonii* C-113

---

*Oceanimonas* sp. GK1

---

*Pantoea ananatis* LMG 20103

---

*Pantoea* sp. At-9b

---

*Pantoea vagans* C9-1

---

*Pectobacterium atrosepticum* SCRI1043

---

*Pectobacterium carotovorum* subsp. *carotovorum* PCC21

---

## **Gamma-Proteobacteria**

---

*Pectobacterium* sp. SCC3193

---

*Pectobacterium wasabiae* WPP163

---

*Photobacterium profundum* SS9

---

*Photorhabdus asymbiotica*

---

*Photorhabdus luminescens* subsp. *laumondii* TTO1

---

*Proteus mirabilis* BB2000

---

*Providencia stuartii* MRSN 2154

---

*Pseudoalteromonas atlantica* T6c

---

*Pseudoalteromonas haloplanktis* TAC125

---

*Pseudoalteromonas* sp. SM9913

---

*Pseudomonas aeruginosa* PA1

---

*Pseudomonas brassicacearum* subsp. *brassicacearum* NFM421

---

*Pseudomonas denitrificans* ATCC 13867

---

*Pseudomonas entomophila* L48

---

*Pseudomonas fluorescens* A506

---

*Pseudomonas fulva* 12-X

---

*Pseudomonas mendocina* ymp

---

*Pseudomonas monteilii* SB3101

---

*Pseudomonas poae* RE\*1-1-14

---

*Pseudomonas protegens* Pf-5

---

*Pseudomonas putida* BIRD-1

---

*Pseudomonas resinovorans* NBRC 106553

---

*Pseudomonas* sp. TKP

---

*Pseudomonas stutzeri* DSM 4166

---

*Pseudomonas syringae* pv. *syringae* B728a

---

*Pseudoxanthomonas spadix* BD-a59

---

## **Gamma-Proteobacteria**

---

*Pseudoxanthomonas suwonensis* 11-1

---

*Psychrobacter arcticus* 273-4

---

*Psychrobacter cryohalolentis* K5

---

*Psychrobacter* sp. PRwf-1

---

*Psychromonas* sp. CNPT3

---

*Rahnella aquatilis* CIP 78.65 = ATCC 33071

---

*Rahnella* sp. Y9602

---

*Rhodanobacter* sp. 2APBS1

---

*Saccharophagus degradans* 2-40

---

*Salmonella bongori* NCTC 12419

---

*Salmonella enterica* subsp. *enterica* serovar *Typhi* str. *Ty21a*

---

*Serratia liquefaciens* ATCC 27592

---

*Serratia marcescens* WW4

---

*Serratia plymuthica* AS9

---

*Serratia proteamaculans* 568

---

*Serratia* sp. AS12

---

*Shewanella amazonensis* SB2B

---

*Shewanella baltica* BA175

---

*Shewanella denitrificans* OS217

---

*Shewanella frigidimarina* NCIMB 400

---

*Shewanella halifaxensis* HAW-EB4

---

*Shewanella loihica* PV-4

---

*Shewanella pealeana* ATCC 700345

---

*Shewanella piezotolerans* WP3

---

*Shewanella putrefaciens* 200

---

*Shewanella sediminis* HAW-EB3

---

## **Gamma-Proteobacteria**

---

---

*Shewanella* sp. ANA-3

---

*Shewanella violacea* DSS12

---

*Shewanella woodyi* ATCC 51908

---

*Shigella boydii* CDC 3083-94

---

*Shigella flexneri* 2a str. 301

---

*Shigella sonnei* Ss046

---

*Simiduia agarivorans* SA1 = DSM 21679

---

*Stenotrophomonas maltophilia* JV3

---

*Teredinibacter turnerae* T7901

---

*Thalassolituus oleivorans* MIL-1

---

*Thioalkalivibrio* sp. K90mix

---

*Thioalkalivibrio sulfidophilus* HL-EbGr7

---

*Thiocystis violascens* DSM 198

---

*Thiomicrospira crunogena* XCL-2

---

*Vibrio alginolyticus* NBRC 15630 = ATCC 17749

---

*Vibrio anguillarum* 775

---

*Vibrio campbellii* ATCC BAA-1116

---

*Vibrio cholerae* O395

---

*Vibrio fischeri* ES114

---

*Vibrio furnissii* NCTC 11218

---

*Vibrio harveyi* ATCC BAA-1116

---

*Vibrio nigripulchritudo*

---

*Vibrio parahaemolyticus* RIMD 2210633

---

*Vibrio* sp. EJY3

---

*Vibrio splendidus* LGP32

---

*Vibrio vulnificus* CMCP6

---



## **Gamma-Proteobacteria**

---

*Xanthomonas albilineans* GPE PC73

---

*Xanthomonas axonopodis* pv. *citrumelo* F1

---

*Xanthomonas campestris* pv. *vesicatoria* str. 85-10

---

*Xanthomonas citri* subsp. *citri* Aw12879

---

*Xanthomonas oryzae* pv. *oryzae* KACC 10331

---

*Xenorhabdus bovienii* SS-2004

---

*Xenorhabdus nematophila* ATCC 19061

---

*Xylella fastidiosa* subsp. *fastidiosa* GB514

---

*Yersinia enterocolitica* subsp. *enterocolitica* 8081

---

*Yersinia pestis* Antiqua

---

*Yersinia pseudotuberculosis* YPIII

---

## **Beta-Proteobacteria**

---

*Achromobacter xylosoxidans* NBRC 15126 = ATCC 27061

---

*Acidithiobacillus caldus* SM-1

---

*Bordetella pertussis* 18323

---

*Candidatus Accumolibacter phosphatis* clade IIA str. UW-1

---

*Collimonas fungivorans* Ter331

---

*Gallionella capsiferriformans* ES-2

---

*Janthinobacterium* sp. Marseille

---

*Ralstonia pickettii* 12J

---

*Ralstonia solanacearum* Po82

---

*Variovorax paradoxus* S110

---

**Supplementary Table 11: Aer2-like pentapeptide tethers:**

| <b>Organism identifier</b> | <b>locus</b> | <b>accession</b> | <b>pentapeptide</b> |
|----------------------------|--------------|------------------|---------------------|
| Al_mac_7736                | I876_01970   | YP_008194818.1   | DWEAF               |
| Al_mac_7736                | I876_02010   | YP_008194826.1   | EWETF               |

| <b>Organism identifier</b> | <b>locus</b> | <b>accession</b>       | <b>pentapeptide</b> |
|----------------------------|--------------|------------------------|---------------------|
| Al_mac_7736                | I876_02015   | YP_008194827.1         | EWESF               |
| Al_sp._1413                | ambt_16735   | YP_004468654.1         | EWEAF               |
| Al_vin_90                  | Alvin_0183   | YP_003442182.1         | QWEEF               |
| Al_vin_90                  | Alvin_1872   | YP_003443828.1         |                     |
| Al_vin_90                  | Alvin_2222   | YP_003444173.1         |                     |
| Al_vin_90                  | Alvin_2230   | YP_003444181.1         |                     |
| Gl_nit_1515                | GNIT_1657    | YP_004871766.1         | EWKEF               |
| Gl_sp._1395                | Glaag_2576   | YP_004434785.1         | EWESF               |
| Ha_che_746                 | HCH_00457    | YP_431792.1            | DWEVF               |
| Ha_che_746                 | HCH_00458    | YP_431793.1            | DWEVF               |
| Ha_hal_741                 | Hhal_2163    | YP_001003729.1         | EWEEF               |
| Li_ang_7812                | N175_16910   | YP_008489689.1         | EWEEF               |
| Ma_med_1360                | Marme_1102   | YP_004312213.1         | DWEEF               |
| Ma_sp._859                 | Mmwyl1_3301  | YP_001342141.1         | GWEEF               |
| Me_alc_1536                | MEALZ_2872   | YP_004918123.1         | EWEEF               |
| Me_met_1418                | Metme_2154   | YP_004513058.1         | EWQDF               |
| Ps_aer_479                 | PA0176       | NP_248866.1            | GWEEF               |
| Ps_aer_7891                | PA1S_gp3690  | REF_DMTMMU:PA1S_gp3690 | GWEEF               |
| Ps_den_2356                | H681_00805   | YP_007655583.1         | DWEEF               |
| Ps_res_7713                | PCA10_13880  | YP_008101725.1         | EWEEF               |
| Ps_sp._1241                | PSM_A2954    | YP_004070018.1         | EWEEF               |
| Ps_suw_1301                | Psesu_0059   | YP_004145153.1         | DWQEF               |
| Ps_suw_1301                | Psesu_1463   | YP_004146541.1         |                     |
| Ps_suw_1301                | Psesu_1465   | YP_004146543.1         | EWAKF               |
| Ps_suw_1301                | Psesu_1466   | YP_004146544.1         | DWAEF               |
| Sa_deg_468                 | Sde_3105     | YP_528574.1            | DWEDF               |
| Sh_ama_634                 | Sama_3497    | YP_929369.1            | EWHEF               |
| Sh_bal_241                 | Sbal175_2162 | YP_006020732.1         | EWEEF               |
| Sh_loi_680                 | Shew_0111    | YP_001092242.1         | EWNEF               |

| <b>Organism identifier</b> | <b>locus</b>  | <b>accession</b> | <b>pentapeptide</b> |
|----------------------------|---------------|------------------|---------------------|
| Sh_one_481                 | SO_2123       | NP_717726.1      | EWEEF               |
| Sh_sed_917                 | Ssed_0184     | YP_001471925.1   | EWNEF               |
| Sh_sp._679                 | Shewana3_2216 | YP_869851.1      | EWEDF               |
| Sh_vio_130                 | SVI_0176      | YP_003554925.1   | EWNEF               |
| Sh_woo_862                 | Swoo_0164     | YP_001758560.1   | EWNEF               |
| Si_aga_2165                | M5M_00415     | YP_006915050.1   | EWEEF               |
| St_mal_1491                | BurJV3_1158   | YP_004791716.1   | GWEEF               |
| St_mal_1491                | BurJV3_1903   | YP_004792454.1   | DWQEF               |
| St_mal_1491                | BurJV3_1904   | YP_004792455.1   | DWQEF               |
| St_mal_1491                | BurJV3_1908   | YP_004792459.1   | DWQEF               |
| St_mal_1491                | BurJV3_2459   | YP_004793006.1   |                     |
| St_mal_1491                | BurJV3_3037   | YP_004793581.1   |                     |
| St_mal_1491                | BurJV3_3580   | YP_004794119.1   |                     |
| St_mal_1491                | BurJV3_3943   | YP_004794481.1   |                     |
| Te_tur_1125                | TERTU_1341    | YP_003072897.1   | EWEDF               |
| Te_tur_1125                | TERTU_2935    | YP_003074319.1   |                     |
| Th_cru_598                 | Tcr_0553      | YP_390823.1      | DWSDF               |
| Th_cru_598                 | Tcr_2004      | YP_392268.1      |                     |
| Th_ole_2361                | TOL_2508      | YP_007683144.1   | EWEEF               |
| Th_vio_1521                | Thivi_0439    | YP_006412631.1   | QWEEF               |
| Th_vio_1521                | Thivi_1211    | YP_006413359.1   | DWEEF               |
| Th_vio_1521                | Thivi_1222    | YP_006413370.1   | EWSEF               |
| Vi_ang_1433                | VAA_01905     | YP_004577835.1   | EWEEF               |
| Vi_cho_1795                | VC395_0082    | YP_002818346.1   | EWESF               |
| Vi_cho_1795                | VC395_A1113   | YP_002822179.1   | EWEEF               |
| Vi_cho_319                 | VC0098        | NP_229757.1      | EWESF               |
| Vi_cho_319                 | VCA1092       | NP_233472.1      | EWEEF               |
| Vi_fur_1564                | vfu_B00980    | YP_005049501.1   | EWEEF               |
| Vi_nig_7850                | VIBNI_B0011   | YP_008640924.1   | EWEEF               |

| <b>Organism identifier</b> | <b>locus</b> | <b>accession</b> | <b>pentapeptide</b> |
|----------------------------|--------------|------------------|---------------------|
| Vi_nig_7850                | VIBNI_B0830  | YP_008641677.1   |                     |
| Vi_vul_1326                | VV2_1165     | NP_763073.1      | EWEEF               |
| Xa_alb_65                  | XALc_0649    | YP_003375155.1   | DWEEF               |
| Xa_alb_65                  | XALc_1357    | YP_003375852.1   |                     |
| Xa_alb_65                  | XALc_1361    | YP_003375856.1   | QWRDF               |
| Xa_alb_65                  | XALc_1362    | YP_003375857.1   | HWHEF               |
| Xa_alb_65                  | XALc_1364    | YP_003375859.1   | QWQEF               |
| Xa_alb_65                  | XALc_1365    | YP_003375860.1   | SWQEF               |
| Xa_alb_65                  | XALc_1926    | YP_003376405.1   |                     |
| Xa_alb_65                  | XALc_2151    | YP_003376626.1   | NWQEF               |
| Xa_alb_65                  | XALc_2152    | YP_003376627.1   | DWQEF               |
| Xa_alb_65                  | XALc_2153    | YP_003376628.1   | DWQEF               |
| Xa_alb_65                  | XALc_3131    | YP_003377604.1   |                     |
| Xa_axo_1502                | XACM_0614    | YP_004850217.1   |                     |
| Xa_axo_1502                | XACM_1288    | YP_004850870.1   | DWQDF               |
| Xa_axo_1502                | XACM_1685    | YP_004851263.1   |                     |
| Xa_axo_1502                | XACM_1913    | YP_004851485.1   | NWQEF               |
| Xa_axo_1502                | XACM_1918    | YP_004851490.1   |                     |
| Xa_axo_1502                | XACM_1920    | YP_004851492.1   | NWQEF               |
| Xa_axo_1502                | XACM_1921    | YP_004851493.1   | DWQEF               |
| Xa_axo_1502                | XACM_1922    | YP_004851494.1   |                     |
| Xa_axo_1502                | XACM_1923    | YP_004851495.1   | SWQEF               |
| Xa_axo_1502                | XACM_1925    | YP_004851496.1   | NWAEF               |
| Xa_axo_1502                | XACM_1926    | YP_004851497.1   | DWSEF               |
| Xa_axo_1502                | XACM_1927    | YP_004851498.1   | QWQDF               |
| Xa_axo_1502                | XACM_1929    | YP_004851500.1   | QWQDF               |
| Xa_axo_1502                | XACM_1930    | YP_004851501.1   |                     |
| Xa_axo_1502                | XACM_1932    | YP_004851503.1   | NWQEF               |
| Xa_axo_1502                | XACM_1933    | YP_004851504.1   | SWQEF               |

| <b>Organism identifier</b> | <b>locus</b> | <b>accession</b> | <b>pentapeptide</b> |
|----------------------------|--------------|------------------|---------------------|
| Xa_axo_1502                | XACM_3051    | YP_004852602.1   |                     |
| Xa_cam_666                 | XCV0669      | YP_362400.1      |                     |
| Xa_cam_666                 | XCV1702      | YP_363433.1      |                     |
| Xa_cam_666                 | XCV1933      | YP_363664.1      | NWQEF               |
| Xa_cam_666                 | XCV1938      | YP_363669.1      |                     |
| Xa_cam_666                 | XCV1939      | YP_363670.1      | NWQEF               |
| Xa_cam_666                 | XCV1940      | YP_363671.1      | DWQEF               |
| Xa_cam_666                 | XCV1941      | YP_363672.1      |                     |
| Xa_cam_666                 | XCV1942      | YP_363673.1      | SWQEF               |
| Xa_cam_666                 | XCV1944      | YP_363675.1      | SWQEF               |
| Xa_cam_666                 | XCV1945      | YP_363676.1      | NWAEF               |
| Xa_cam_666                 | XCV1947      | YP_363678.1      | DWSEF               |
| Xa_cam_666                 | XCV1948      | YP_363679.1      | QWQDF               |
| Xa_cam_666                 | XCV1951      | YP_363682.1      | QWQDF               |
| Xa_cam_666                 | XCV1952      | YP_363683.1      |                     |
| Xa_cam_666                 | XCV1954      | YP_363685.1      | NWQEF               |
| Xa_cam_666                 | XCV1955      | YP_363686.1      | SWQEF               |
| Xa_cam_666                 | XCV3261      | YP_364992.1      |                     |
| Xa_cit_2353                | XCAW_02407   | YP_007650389.1   |                     |
| Xa_cit_2353                | XCAW_02490   | YP_007650471.1   | DWQEF               |
| Xa_cit_2353                | XCAW_02492   | YP_007650473.1   |                     |
| Xa_cit_2353                | XCAW_02493   | YP_007650474.1   | QWQDF               |
| Xa_cit_2353                | XCAW_02495   | YP_007650476.1   | QWQDF               |
| Xa_cit_2353                | XCAW_02496   | YP_007650477.1   | DWSEF               |
| Xa_cit_2353                | XCAW_02497   | YP_007650478.1   | NWAEF               |
| Xa_cit_2353                | XCAW_02498   | YP_007650479.1   | SWQEF               |
| Xa_cit_2353                | XCAW_02499   | YP_007650480.1   | SWQEF               |
| Xa_cit_2353                | XCAW_02500   | YP_007650481.1   |                     |
| Xa_cit_2353                | XCAW_02501   | YP_007650482.1   | NWQEF               |

| <b>Organism identifier</b> | <b>locus</b> | <b>accession</b> | <b>pentapeptide</b> |
|----------------------------|--------------|------------------|---------------------|
| Xa_cit_2353                | XCAW_02502   | YP_007650483.1   | NWQEF               |
| Xa_cit_2353                | XCAW_02504   | YP_007650485.1   |                     |
| Xa_cit_2353                | XCAW_02508   | YP_007650489.1   | NWQEF               |
| Xa_cit_2353                | XCAW_03417   | YP_007651390.1   |                     |
| Xa_cit_2353                | XCAW_03970   | YP_007651933.1   |                     |
| Xa_cit_2353                | XCAW_04466   | YP_007652428.1   |                     |
| Xa_ory_584                 | XOO2840      | YP_201479.1      | DWAEF               |
| Xa_ory_584                 | XOO2842      | YP_201481.6      | NWAEF               |
| Xa_ory_584                 | XOO2844      | YP_201483.1      | SWQEF               |
| Xa_ory_584                 | XOO2845      | YP_201484.1      |                     |
| Xa_ory_584                 | XOO2847      | YP_201486.1      | NWQDF               |
| Xa_ory_584                 | XOO2848      | YP_201487.6      | DWQDF               |

**Supplementary Table 12: McpA-like C-terminal motif**

| <b>Organism identifier</b> | <b>locus</b>  | <b>accession</b>       | <b>pentapeptide</b> |
|----------------------------|---------------|------------------------|---------------------|
| Al_mac_7736                | I876_01990    | YP_008194822.1         | DIELF-              |
| Al_mac_7736                | I876_01950    | YP_008194814.1         | EVELF-              |
| Al_sp._1413                | ambt_16755    | YP_004468658.1         | EVELF-              |
| Gl_sp._1395                | Glaag_2582    | YP_004434791.1         | DLELF-              |
| Ma_med_1360                | Marme_1096    | YP_004312207.1         | EIDLF-              |
| Ma_sp._859                 | Mmwyl1_3295   | YP_001342135.1         | DIDLF-              |
| Sh_sp._679                 | Shewana3_2222 | YP_869857.1            | EIELF-              |
| Sh_one_481                 | SO_2117       | NP_717720.2            | EIELF-              |
| Sh_bal_241                 | Sbal175_2156  | YP_006020726.1         | EIELF-              |
| Ps_den_2356                | H681_00825    | YP_007655587.1         | EVELF-              |
| Ps_res_7713                | PCA10_13920   | YP_008101729.1         | EVELF-              |
| Ps_aer_479                 | PA0180        | NP_248870.1            | EVELF-              |
| Ps_aer_7891                | PA1S_gp3694   | REF_DMTMMU:PA1S_gp3694 | EVELF-              |

| <b>Organism identifier</b> | <b>locus</b> | <b>accession</b> | <b>pentapeptide</b> |
|----------------------------|--------------|------------------|---------------------|
| Th_cru_598                 | Tcr_0759     | YP_391029.1      | EIDLF-              |
| Ha_hal_741                 | Hhal_2159    | YP_001003725.1   | DVELF-              |
| Gl_nit_1515                | GNIT_1661    | YP_004871770.1   | DIELF-              |
| Me_alc_1536                | MEALZ_2878   | YP_004918129.1   | DIELF-              |
| Me_met_1418                | Metme_2161   | YP_004513065.1   | DVELF-              |
| Fr_aur_1557                | Fraau_2042   | YP_005378108.1   | DIDLF-              |
| Rh_sp_1523                 | R2APBS1_2961 | YP_007591271.1   | EIELF-              |
| Al_vin_90                  | Alvin_2234   | YP_003444185.1   | DIELF-              |
| Th_vio_1521                | Thivi_1219   | YP_006413367.1   | DIELF-              |
| Ha_che_746                 | HCH_00449    | YP_431784.1      | DIELF-              |
| Sa_deg_468                 | Sde_3111     | YP_528580.1      | EIVLY-              |
| Te_tur_1125                | TERTU_1204   | YP_003072781.1   | DIELYE              |
| Ps_suw_1301                | Psesu_1530   | YP_004146608.1   | TVELF-              |
| Xa_alb_65                  | XALc_1440    | YP_003375935.1   | TVELF-              |
| St_mal_1491                | BurJV3_1974  | YP_004792525.1   | TVELF-              |
| Xa_ory_584                 | XOO2558      | YP_201197.1      | TVELF-              |
| Xa_cit_2353                | XCAW_01830   | YP_007649819.1   | TVELF-              |
| Xa_axo_1502                | XACM_2022    | YP_004851592.1   | TVELF-              |
| Xa_cam_666                 | XCV2044      | YP_363775.1      | TVELF-              |
| Vi_vul_1326                | VV2_1160     | NP_763069.1      | EVELF-              |
| Vi_nig_7850                | VIBNI_B0016  | YP_008640928.1   | EVELF-              |
| Vi_fur_1564                | vfu_B00976   | YP_005049497.1   | EVELF-              |
| Vi_cho_1795                | VC395_A1109  | YP_002822175.1   | EVELF-              |
| Vi_cho_319                 | VCA1088      | NP_233469.1      | EVELF-              |
| Vi_ang_1433                | VAA_01909    | YP_004577831.1   | EVELF-              |
| Li_ang_7812                | N175_16890   | YP_008489685.1   | EVELF-              |

## Supplementary Note 1

```
{
  "patterns": [
    {
      "npos": [
        {
          "count": "{0}"
          "name": "TM",
          "resource": "tmhmm2",
        }
      ],
      "pos": [
        {
          "name": "^",
          "resource": "regarch"
        },
        {
          "name": "Response_reg",
          "resource": "pfam30"
        },
        {
          "name": "$",
          "resource": "regarch"
        }
      ]
    }
  ]
}
```

## Supplementary References

1. Rosario, M. M. L. & Ordal, G. W. CheC and CheD interact to regulate methylation of *Bacillus subtilis* methyl-accepting chemotaxis proteins. *Mol. Microbiol.* **21**, 511–518 (1996).
2. Glekas, G. D. *et al.* Elucidation of the multiple roles of CheD in *Bacillus subtilis* chemotaxis. *Mol. Microbiol.* **86**, 743–756 (2012).
3. Huang, Z. *et al.* Cross Talk between Chemosensory Pathways That Modulate Chemotaxis and Biofilm Formation. *mBio* **10**, (2019).
4. Ortega, D. R. *et al.* Assigning chemoreceptors to chemosensory pathways in *Pseudomonas aeruginosa*. *Proc. Natl. Acad. Sci. U. S. A.* (2017) doi:10.1073/pnas.1708842114.



5. Güvener, Z. T., Tifrea, D. F. & Harwood, C. S. Two different *Pseudomonas aeruginosa* chemosensory signal transduction complexes localize to cell poles and form and remould in stationary phase. *Mol. Microbiol.* **61**, 106–118 (2006).
6. Herrera Seitz, M. K., Frank, V., Massazza, D. A., Vaknin, A. & Studdert, C. A. Bacterial chemoreceptors of different length classes signal independently. *Mol Microbiol* **93**, 814–22 (2014).
7. Kim, K. K., Yokota, H. & Kim, S. H. Four-helical-bundle structure of the cytoplasmic domain of a serine chemotaxis receptor. *Nature* **400**, 787–92 (1999).
8. Li, M. & Hazelbauer, G. L. Cellular Stoichiometry of the Components of the Chemotaxis Signaling Complex. *J Bacteriol* **186**, 3687–3694 (2004).
9. Cannistraro, V. J., Glekas, G. D., Rao, C. V. & Ordal, G. W. Cellular stoichiometry of the chemotaxis proteins in *Bacillus subtilis*. *J. Bacteriol.* **193**, 3220–3227 (2011).
10. Briegel, A. *et al.* New Insights into Bacterial Chemoreceptor Array Structure and Assembly from Electron Cryotomography. *Biochemistry* **53**, 1575–1585 (2014).
11. Masduki, A. *et al.* Isolation and characterization of chemotaxis mutants and genes of *Pseudomonas aeruginosa*. *J Bacteriol* **177**, 5 (1995).
12. Gosink, K. K., Kobayashi, R., Kawagishi, I. & Hase, C. C. Analyses of the roles of the three cheA homologs in chemotaxis of *Vibrio cholerae*. *J. Bacteriol.* **184**, 1767–71 (2002).
13. Li, J., Romine, M. F. & Ward, M. J. Identification and analysis of a highly conserved chemotaxis gene cluster in *Shewanella* species. *FEMS Microbiol Lett* **273**, 180–6 (2007).
14. Ringgaard, S., Hubbard, T., Mandlik, A., Davis, B. M. & Waldor, M. K. RpoS and quorum sensing control expression and polar localization of *Vibrio cholerae* chemotaxis cluster III proteins in vitro and in vivo. *Mol. Microbiol.* **97**, 660–675 (2015).

15. Schuster, M., Hawkins, A. C., Harwood, C. S. & Greenberg, E. P. The *Pseudomonas aeruginosa* RpoS regulon and its relationship to quorum sensing. *Mol. Microbiol.* **51**, 973–985 (2004).
16. Harris, H. W., El-Naggar, M. Y. & Nealson, K. H. *Shewanella oneidensis* MR-1 chemotaxis proteins and electron-transport chain components essential for congregation near insoluble electron acceptors. *Biochem Soc Trans* **40**, 1167–77 (2012).
17. Khmelenina, V. N., Kalyuzhnaya, M. G., Starostina, N. G., Suzina, N. E. & Trotsenko, Y. A. Isolation and Characterization of Halotolerant Alkaliphilic Methanotrophic Bacteria from Tuva Soda Lakes. *Curr. Microbiol.* **35**, 257–261 (1997).
18. Greer-Phillips, S. E. *et al.* The Aer2 receptor from *Vibrio cholerae* is a dual PAS-heme oxygen sensor. *Mol. Microbiol.* **109**, 209–224 (2018).
19. Garcia, D., Orillard, E., Johnson, M. S. & Watts, K. J. Gas Sensing and Signaling in the PAS-Heme Domain of the *Pseudomonas aeruginosa* Aer2 Receptor. *J. Bacteriol.* **199**, e00003-17 (2017).
20. Kim, H. E. *et al.* Identification and characterization of the chemotactic transducer in *Pseudomonas aeruginosa* PAO1 for positive chemotaxis to trichloroethylene. *J Bacteriol* **188**, 6700–2 (2006).
21. Ferris, H. U., Zeth, K., Hulko, M., Dunin-Horkawicz, S. & Lupas, A. N. Axial helix rotation as a mechanism for signal regulation inferred from the crystallographic analysis of the *E. coli* serine chemoreceptor. *J. Struct. Biol.* **186**, 349–356 (2014).
22. Airola, M. V. *et al.* Architecture of the Soluble Receptor Aer2 Indicates an In-Line Mechanism for PAS and HAMP Domain Signaling. *J. Mol. Biol.* **425**, 886–901 (2013).

23. Sawai, H. *et al.* Structural basis for oxygen sensing and signal transduction of the heme-based sensor protein Aer2 from *Pseudomonas aeruginosa*. *Chem. Commun.* **48**, 6523–6525 (2012).
24. Airola, M. V. *et al.* HAMP domain conformers that propagate opposite signals in bacterial chemoreceptors. *PLoS Biol* **11**, e1001479 (2013).
